# Supplementary material for: Convolutional Neural Network and Bidirectional Long Short-Term Memory-Based Method for Predicting Drug–Disease Associations
Source: MDPI journal article supplement (doi:10.3390/cells8070705), 2019-07-11
Supplement: s1 [file s1]

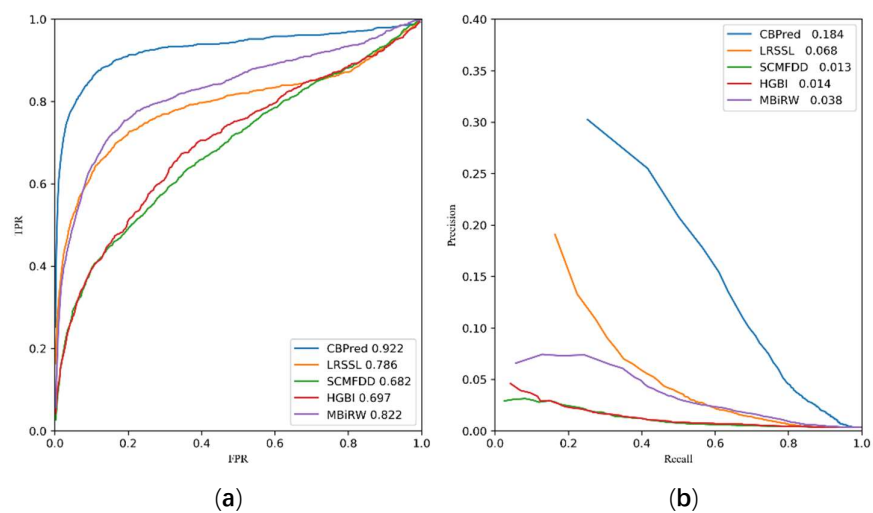

**Figure S1.** Two type of curves of CBPred and other methods under the new drug-disease network. **(a)** Receiver operating feature characteristic (ROC) curves; **(b)** Precision-recall (P-R) curves.
