# Supplementary material for: Convolutional Neural Network and Bidirectional Long Short-Term Memory-Based Method for Predicting Drug–Disease Associations
Source: Cells. 2019 Jul 11;8(7):705. doi: 10.3390/cells8070705 (PMC6679344; doi:10.3390/cells8070705)
Supplement: Supplementary file 1 [file cells-08-00705-s001.zip › TableS1_candidates.xlsx]

## Sheet: a1
Drug name	Candidate disease name	Rank	Association score
6-aminocaproic acid	Purpura	1	0.0754437
6-aminocaproic acid	Hemorrhoids	2	0.0680796
6-aminocaproic acid	Myelitis - Transverse	3	0.0426252
6-aminocaproic acid	Hyperbilirubinemia	4	0.0380745
6-aminocaproic acid	Neurosyphilis	5	0.0342277
6-aminocaproic acid	Fatigue Syndrome - Chronic	6	0.0338427
6-aminocaproic acid	Neurocysticercosis	7	0.0326456
6-aminocaproic acid	Encephalitis - Herpes Simplex	8	0.032531
6-aminocaproic acid	Meningitis - Cryptococcal	9	0.0315787
6-aminocaproic acid	Malaria - Cerebral	10	0.0311945
abacavir	Respiratory Distress Syndrome - Newborn	1	0.0442525
abacavir	Hypotension - Orthostatic	2	0.0306152
abacavir	Respiratory Tract Diseases	3	0.0302694
abacavir	Dyspepsia	4	0.0301783
abacavir	Gastrointestinal Neoplasms	5	0.0282724
abacavir	Pruritus	6	0.0277863
abacavir	Mesothelioma	7	0.0276548
abacavir	Dysentery - Bacillary	8	0.0269779
abacavir	Torsades de Pointes	9	0.0269734
abacavir	Coronary Disease	10	0.0267192
acarbose	Hypercalcemia	1	0.055378
acarbose	Mydriasis	2	0.0407065
acarbose	Toxoplasmosis	3	0.039109
acarbose	Cellulitis	4	0.0366308
acarbose	Otitis Media	5	0.0351048
acarbose	Abdominal Abscess	6	0.034413
acarbose	Neurologic Manifestations	7	0.0341361
acarbose	Fatigue	8	0.0323918
acarbose	Foot Dermatoses	9	0.0319678
acarbose	Hypotension - Orthostatic	10	0.0315965
acebutolol	Syphilis	1	0.0945387
acebutolol	Arterial Occlusive Diseases	2	0.0940821
acebutolol	Vaginosis - Bacterial	3	0.062531
acebutolol	Varicose Veins	4	0.0618475
acebutolol	Encephalitis - Herpes Simplex	5	0.0606116
acebutolol	Pulmonary Edema	6	0.0528514
acebutolol	Arteriosclerosis	7	0.0430378
acebutolol	Fungemia	8	0.0410386
acebutolol	Coronary Artery Disease	9	0.0396227
acebutolol	Headache	10	0.0344241
acetaminophen	Adrenal Hyperplasia - Congenital	1	0.0269302
acetaminophen	Polyuria	2	0.0263477
acetaminophen	Endocarditis - Subacute Bacterial	3	0.0263328
acetaminophen	Condylomata Acuminata	4	0.0260002
acetaminophen	Keratitis	5	0.0255043
acetaminophen	Porphyria Cutanea Tarda	6	0.0224635
acetaminophen	Paget Disease - Extramammary	7	0.0223138
acetaminophen	Rheumatic Diseases	8	0.0217546
acetaminophen	Erythrasma	9	0.0208527
acetaminophen	Herpes Labialis	10	0.0207256
acetazolamide	Giardiasis	1	0.0835558
acetazolamide	Lymphoma - Non-Hodgkin	2	0.075705
acetazolamide	Obesity	3	0.0711725
acetazolamide	Schizophrenia	4	0.0687952
acetazolamide	Blastomycosis	5	0.0652496
acetazolamide	Condylomata Acuminata	6	0.0582331
acetazolamide	Extravasation of Diagnostic and Therapeutic Materials	7	0.0526182
acetazolamide	Urticaria	8	0.046963
acetazolamide	Pulmonary Edema	9	0.0458132
acetazolamide	Polycythemia Vera	10	0.0357609
acetohexamide	Hypercalcemia	1	0.0436047
acetohexamide	Mydriasis	2	0.0398129
acetohexamide	Toxoplasmosis	3	0.0379154
acetohexamide	Otitis Media	4	0.0338129
acetohexamide	Abdominal Abscess	5	0.0331619
acetohexamide	Neurologic Manifestations	6	0.0329456
acetohexamide	Fatigue	7	0.0315175
acetohexamide	Cellulitis	8	0.0312173
acetohexamide	Hypotension - Orthostatic	9	0.0308399
acetohexamide	Foot Dermatoses	10	0.0305493
acitretin	Sunburn	1	0.0423822
acitretin	Myelitis - Transverse	2	0.0422667
acitretin	Toxoplasmosis	3	0.0411876
acitretin	Seizures - Febrile	4	0.0392621
acitretin	Otitis Media - Suppurative	5	0.0373453
acitretin	Abdominal Abscess	6	0.0367222
acitretin	Neurosyphilis	7	0.0362246
acitretin	Meningitis - Bacterial	8	0.0355414
acitretin	Urinary Bladder Neoplasms	9	0.0352125
acitretin	Endocarditis - Bacterial	10	0.0351688
acyclovir	Adenomatous Polyposis Coli	1	0.354286
acyclovir	Vasculitis	2	0.315845
acyclovir	Hepatic Encephalopathy	3	0.239887
acyclovir	Pyoderma Gangrenosum	4	0.203916
acyclovir	Menopause - Premature	5	0.178088
acyclovir	Hemorrhage	6	0.164335
acyclovir	Obesity	7	0.162656
acyclovir	Cystinosis	8	0.154747
acyclovir	Lyme Disease	9	0.13477
acyclovir	Tinea Versicolor	10	0.129411
adapalene	Sunburn	1	0.043045
adapalene	Mydriasis	2	0.042582
adapalene	Toxoplasmosis	3	0.041251
adapalene	Seizures - Febrile	4	0.0397168
adapalene	Otitis Media	5	0.0374144
adapalene	Abdominal Abscess	6	0.0368
adapalene	Neurologic Manifestations	7	0.0362874
adapalene	Meningeal Neoplasms	8	0.0360246
adapalene	Endocarditis	9	0.035623
adapalene	Urinary Bladder Neoplasms	10	0.035526
adefovir	Liver Cirrhosis	1	0.0634933
adefovir	Pancreatic Neoplasms	2	0.0511199
adefovir	Cellulitis	3	0.0482937
adefovir	Sunburn	4	0.0448473
adefovir	Respiratory Distress Syndrome - Newborn	5	0.0418291
adefovir	Toxoplasmosis	6	0.0414638
adefovir	Seizures - Febrile	7	0.0414588
adefovir	Otitis Media	8	0.0376523
adefovir	Meningeal Neoplasms	9	0.0376364
adefovir	Endocarditis - Bacterial	10	0.0374796
adenosine	Gangrene	1	0.0962709
adenosine	Arteriosclerosis	2	0.0779524
adenosine	Varicose Veins	3	0.0674217
adenosine	Pulmonary Emphysema	4	0.066196
adenosine	Arteriosclerosis Obliterans	5	0.0628164
adenosine	Hypercholesterolemia	6	0.0620853
adenosine	Nausea	7	0.0590117
adenosine	Endocarditis	8	0.0527856
adenosine	Motion Sickness	9	0.05006
adenosine	Arterial Occlusive Diseases	10	0.0458283
albendazole	Magnesium Deficiency	1	0.678737
albendazole	Amebiasis	2	0.594217
albendazole	Lymphoma	3	0.5209
albendazole	Stomach Neoplasms	4	0.429714
albendazole	Arthritis - Rheumatoid	5	0.421991
albendazole	Tobacco Use Disorder	6	0.411822
albendazole	Torticollis	7	0.353639
albendazole	Myocardial Infarction	8	0.335296
albendazole	Chromoblastomycosis	9	0.283889
albendazole	Obesity	10	0.279208
albuterol	Pulmonary Embolism	1	0.0444597
albuterol	Toxoplasmosis	2	0.039114
albuterol	Causalgia	3	0.0366782
albuterol	Otitis Media	4	0.0350977
albuterol	Abdominal Abscess	5	0.034402
albuterol	Neurologic Manifestations	6	0.0341273
albuterol	Foot Dermatoses	7	0.0319119
albuterol	Fatigue	8	0.0317014
albuterol	Malaria - Avian	9	0.0309848
albuterol	Polycythemia Vera	10	0.0304095
alclometasone	Keratitis	1	0.230557
alclometasone	Acne Vulgaris	2	0.178908
alclometasone	Fever	3	0.17736
alclometasone	Shock - Septic	4	0.176781
alclometasone	Collagen Diseases	5	0.168599
alclometasone	Pharyngitis	6	0.168385
alclometasone	Kidney Failure - Chronic	7	0.163893
alclometasone	Hypercalcemia	8	0.161179
alclometasone	Eclampsia	9	0.158105
alclometasone	Liver Neoplasms	10	0.157026
alendronate	Neurocysticercosis	1	0.044433
alendronate	Toxoplasmosis	2	0.03893
alendronate	Hypoventilation	3	0.0361476
alendronate	Cellulitis	4	0.0357333
alendronate	Encephalitis - Herpes Simplex	5	0.0353494
alendronate	Otitis Media - Suppurative	6	0.0349929
alendronate	Abdominal Abscess	7	0.0343354
alendronate	Meningitis - Cryptococcal	8	0.0342416
alendronate	Neurosyphilis	9	0.0340953
alendronate	Respiratory Tract Diseases	10	0.0326725
alitretinoin	Respiratory Syncytial Virus Infections	1	0.0438287
alitretinoin	Toxocariasis	2	0.0398223
alitretinoin	Otitis Media - Suppurative	3	0.035897
alitretinoin	Abdominal Abscess	4	0.0352335
alitretinoin	Substance-Related Disorders	5	0.0333037
alitretinoin	Fungemia	6	0.0328417
alitretinoin	Hypoventilation	7	0.0321693
alitretinoin	Malaria - Cerebral	8	0.0317872
alitretinoin	Polyuria	9	0.0315862
alitretinoin	Respiratory Tract Fistula	10	0.0314779
allopurinol	Hypercalcemia	1	0.0821462
allopurinol	Sunburn	2	0.0477393
allopurinol	Mydriasis	3	0.0441774
allopurinol	Seizures - Febrile	4	0.0434962
allopurinol	Toxoplasmosis	5	0.0417429
allopurinol	Endocarditis - Bacterial	6	0.0398033
allopurinol	Meningeal Neoplasms	7	0.0397531
allopurinol	Otitis Media	8	0.0379606
allopurinol	Abdominal Abscess	9	0.0374218
allopurinol	Urinary Bladder Neoplasms	10	0.0373845
alprostadil	Abnormalities - Drug-Induced	1	0.77549
alprostadil	Syphilis	2	0.541475
alprostadil	Hypotension	3	0.404984
alprostadil	Constipation	4	0.344304
alprostadil	Corneal Ulcer	5	0.291796
alprostadil	Tachycardia - Ventricular	6	0.288318
alprostadil	Head Injuries - Closed	7	0.285758
alprostadil	Substance-Related Disorders	8	0.280592
alprostadil	Scleroderma - Systemic	9	0.266502
alprostadil	Appendicitis	10	0.257675
amantadine	Echinococcosis	1	0.104237
amantadine	Hepatitis C - Chronic	2	0.0883481
amantadine	Tonsillitis	3	0.069324
amantadine	Soft Tissue Neoplasms	4	0.0612558
amantadine	Constipation	5	0.0566334
amantadine	Scleroderma - Systemic	6	0.0398031
amantadine	Epilepsies - Partial	7	0.0392648
amantadine	Epilepsy - Post-Traumatic	8	0.0355728
amantadine	Epilepsy - Complex Partial	9	0.034732
amantadine	Cluster Headache	10	0.0317352
amcinonide	Acne Vulgaris	1	0.178036
amcinonide	Collagen Diseases	2	0.167899
amcinonide	Fatigue Syndrome - Chronic	3	0.157835
amcinonide	Eclampsia	4	0.155349
amcinonide	Hyperbilirubinemia	5	0.152711
amcinonide	Peritonitis	6	0.152418
amcinonide	Liver Cirrhosis	7	0.150356
amcinonide	Streptococcal Infections	8	0.148606
amcinonide	Rheumatic Diseases	9	0.148265
amcinonide	Persistent Fetal Circulation Syndrome	10	0.145181
amifostine	Burns	1	0.133204
amifostine	Purpura - Thrombocytopenic - Idiopathic	2	0.0820787
amifostine	Malaria - Avian	3	0.0707573
amifostine	Pyoderma Gangrenosum	4	0.0491575
amifostine	Myelitis - Transverse	5	0.0459665
amifostine	Toxoplasmosis - Cerebral	6	0.0396259
amifostine	Cellulitis	7	0.0390544
amifostine	Toxocariasis	8	0.0389701
amifostine	Respiratory Tract Fistula	9	0.0376053
amifostine	Hypoventilation	10	0.0375693
amikacin	Encephalitis - Herpes Simplex	1	0.146721
amikacin	Scleroderma - Systemic	2	0.0930612
amikacin	Status Epilepticus	3	0.0787272
amikacin	Goiter	4	0.0756167
amikacin	Sigmoid Diseases	5	0.0681635
amikacin	Endocarditis - Bacterial	6	0.0676009
amikacin	Oral Ulcer	7	0.0591056
amikacin	Spinal Cord Ischemia	8	0.0540169
amikacin	Arthritis	9	0.0538954
amikacin	Elephantiasis	10	0.0510858
amiloride	Hyperaldosteronism	1	0.0828458
amiloride	Sunburn	2	0.0815622
amiloride	Myocardial Infarction	3	0.0624834
amiloride	Leukocytosis	4	0.0603906
amiloride	Psychotic Disorders	5	0.0484339
amiloride	Pain	6	0.0462998
amiloride	Maxillary Sinusitis	7	0.0458308
amiloride	Mycobacterium avium-intracellulare Infection	8	0.0450354
amiloride	Food Hypersensitivity	9	0.0405684
amiloride	Hypoventilation	10	0.0384504
aminoglutethimide	Enuresis	1	0.102494
aminoglutethimide	Mycoplasma Infections	2	0.0882198
aminoglutethimide	Nephritis	3	0.0826186
aminoglutethimide	Carcinoma - Medullary	4	0.0786201
aminoglutethimide	Lymphoma - Non-Hodgkin	5	0.077188
aminoglutethimide	Leukemia - Myeloid - Acute	6	0.0733185
aminoglutethimide	Bronchial Neoplasms	7	0.0504192
aminoglutethimide	Carcinoma - Squamous Cell	8	0.0457055
aminoglutethimide	Persistent Fetal Circulation Syndrome	9	0.0410857
aminoglutethimide	Tourette Syndrome	10	0.037791
aminophylline	Photophobia	1	0.15651
aminophylline	Spondylitis - Ankylosing	2	0.0927829
aminophylline	Blood Coagulation Disorders	3	0.0900446
aminophylline	Carcinoma	4	0.0829459
aminophylline	Syphilis	5	0.0334708
aminophylline	Arthritis	6	0.0291799
aminophylline	Acromegaly	7	0.028896
aminophylline	Pseudomonas Infections	8	0.0286787
aminophylline	Adrenal Hyperplasia - Congenital	9	0.0285391
aminophylline	Respiratory Syncytial Virus Infections	10	0.027548
aminosalicylic acid	Liver Cirrhosis	1	0.0651775
aminosalicylic acid	Pancreatic Neoplasms	2	0.0551473
aminosalicylic acid	Cholelithiasis	3	0.041433
aminosalicylic acid	Escherichia coli Infections	4	0.0354725
aminosalicylic acid	Hypotension - Orthostatic	5	0.0341699
aminosalicylic acid	Sialorrhea	6	0.0322384
aminosalicylic acid	Respiratory Tract Diseases	7	0.0321425
aminosalicylic acid	Polycythemia Vera	8	0.0320179
aminosalicylic acid	Dyspepsia	9	0.0315022
aminosalicylic acid	Proctitis	10	0.0312061
amiodarone	Myelitis - Transverse	1	0.0421656
amiodarone	Arteriosclerosis	2	0.0398485
amiodarone	Gangrene	3	0.0374036
amiodarone	Neurosyphilis	4	0.0353592
amiodarone	Fatigue Syndrome - Chronic	5	0.0336753
amiodarone	Malaria - Cerebral	6	0.0323265
amiodarone	Neurocysticercosis	7	0.0320503
amiodarone	Meningitis - Cryptococcal	8	0.0320348
amiodarone	Meningitis - Pneumococcal	9	0.031966
amiodarone	Meningitis - Meningococcal	10	0.0316926
amitriptyline	Echinococcosis	1	0.106265
amitriptyline	Hepatitis C - Chronic	2	0.0953652
amitriptyline	Conduct Disorder	3	0.0632953
amitriptyline	Bipolar Disorder	4	0.0544583
amitriptyline	Tonsillitis	5	0.049738
amitriptyline	Attention Deficit Disorder with Hyperactivity	6	0.0492346
amitriptyline	Scabies	7	0.0468821
amitriptyline	Psychomotor Agitation	8	0.0444373
amitriptyline	Constipation	9	0.0405748
amitriptyline	Scalp Dermatoses	10	0.0371835
amlexanox	Myelitis - Transverse	1	0.0416503
amlexanox	Neurosyphilis	2	0.0342076
amlexanox	Fatigue Syndrome - Chronic	3	0.0330653
amlexanox	Neurocysticercosis	4	0.0316894
amlexanox	Encephalitis - Herpes Simplex	5	0.0313455
amlexanox	Malaria - Cerebral	6	0.0311514
amlexanox	Meningitis - Cryptococcal	7	0.0304777
amlexanox	Meningitis - Haemophilus	8	0.0296973
amlexanox	Meningitis - Pneumococcal	9	0.0294908
amlexanox	Meningitis - Meningococcal	10	0.029074
amlodipine	Adrenal Hyperplasia - Congenital	1	0.0261971
amlodipine	Conduct Disorder	2	0.0259977
amlodipine	Polycythemia Vera	3	0.0250396
amlodipine	Joint Diseases	4	0.0247662
amlodipine	Rhabdomyosarcoma	5	0.0217259
amlodipine	Arterial Occlusive Diseases	6	0.0212345
amlodipine	Polyuria	7	0.0211375
amlodipine	Erectile Dysfunction	8	0.0208225
amlodipine	Herpes Labialis	9	0.0207158
amlodipine	Cyanosis	10	0.0197751
amoxapine	Conduct Disorder	1	0.0632962
amoxapine	Bipolar Disorder	2	0.0544694
amoxapine	Attention Deficit Disorder with Hyperactivity	3	0.0495177
amoxapine	Scabies	4	0.0470812
amoxapine	Psychomotor Agitation	5	0.0446353
amoxapine	Scalp Dermatoses	6	0.0372541
amoxapine	Child Behavior Disorders	7	0.0300766
amoxapine	Endocarditis - Bacterial	8	0.0268987
amoxapine	Condylomata Acuminata	9	0.0265123
amoxapine	Polyuria	10	0.0261162
amoxicillin	Leukemia - Myeloid - Accelerated Phase	1	0.222014
amoxicillin	Brucellosis	2	0.125016
amoxicillin	Epilepsy - Tonic-Clonic	3	0.121343
amoxicillin	Pyoderma Gangrenosum	4	0.118791
amoxicillin	Dyskinesias	5	0.113483
amoxicillin	Premenstrual Syndrome	6	0.111489
amoxicillin	Onychomycosis	7	0.104758
amoxicillin	Hematologic Diseases	8	0.104619
amoxicillin	Oral Ulcer	9	0.102434
amoxicillin	Candidiasis - Cutaneous	10	0.101892
ampicillin	Keratosis	1	0.500907
ampicillin	Bacterial Infections	2	0.392328
ampicillin	Respiratory Syncytial Virus Infections	3	0.337403
ampicillin	Respiratory Tract Diseases	4	0.323056
ampicillin	Burns	5	0.287683
ampicillin	Pneumonia, Bacterial	6	0.264743
ampicillin	Toothache	7	0.245907
ampicillin	Respiratory Tract Fistula	8	0.241736
ampicillin	Mouth Diseases	9	0.239626
ampicillin	Sarcoma, Ewings	10	0.23602
amprenavir	Respiratory Distress Syndrome - Newborn	1	0.041051
amprenavir	Hypotension - Orthostatic	2	0.0295952
amprenavir	Dyspepsia	3	0.0287012
amprenavir	Respiratory Tract Diseases	4	0.0286686
amprenavir	Gastrointestinal Neoplasms	5	0.0268654
amprenavir	Mesothelioma	6	0.0260147
amprenavir	Dysentery - Bacillary	7	0.0253507
amprenavir	Meningococcal Infections	8	0.0252155
amprenavir	Nelson Syndrome	9	0.0251351
amprenavir	Torsades de Pointes	10	0.0251028
anagrelide	Hypereosinophilic Syndrome	1	0.143948
anagrelide	Elephantiasis	2	0.140572
anagrelide	Anemia - Megaloblastic	3	0.132311
anagrelide	Thromboangiitis Obliterans	4	0.121678
anagrelide	Blood Coagulation Disorders	5	0.121147
anagrelide	Neutropenia	6	0.0954947
anagrelide	Histiocytosis	7	0.0894993
anagrelide	Hematologic Diseases	8	0.0820449
anagrelide	Mycosis Fungoides	9	0.0467599
anagrelide	Myelitis - Transverse	10	0.0397944
anastrozole	Conjunctivitis - Viral	1	0.110038
anastrozole	Echinococcosis	2	0.105139
anastrozole	Toothache	3	0.0837574
anastrozole	Leukemia - Myeloid - Acute	4	0.0707319
anastrozole	Hepatitis C - Chronic	5	0.0556813
anastrozole	Toxoplasmosis	6	0.0382936
anastrozole	Scleroderma - Systemic	7	0.0381077
anastrozole	Otitis Media	8	0.0342157
anastrozole	Abdominal Abscess	9	0.0335757
anastrozole	Neurologic Manifestations	10	0.0333183
anisindione	Tetralogy of Fallot	1	0.206917
anisindione	Coronary Artery Disease	2	0.203949
anisindione	Head and Neck Neoplasms	3	0.200121
anisindione	Vaginosis - Bacterial	4	0.19666
anisindione	Arteriosclerosis Obliterans	5	0.183711
anisindione	Puberty - Precocious	6	0.181691
anisindione	Arterial Occlusive Diseases	7	0.175336
anisindione	Uveitis - Anterior	8	0.172909
anisindione	Substance-Related Disorders	9	0.168915
anisindione	Tremor	10	0.163182
apraclonidine	Constipation	1	0.110537
apraclonidine	Eclampsia	2	0.105718
apraclonidine	Herpes Genitalis	3	0.0944501
apraclonidine	Toothache	4	0.0844227
apraclonidine	Glaucoma - Angle-Closure	5	0.0760524
apraclonidine	Macular Edema	6	0.0716143
apraclonidine	Glaucoma - Open-Angle	7	0.062572
apraclonidine	Glaucoma	8	0.0585784
apraclonidine	Schizophrenia - Paranoid	9	0.0585608
apraclonidine	Conjunctivitis	10	0.0495356
ardeparin	Arterial Occlusive Diseases	1	0.0667129
ardeparin	Trichuriasis	2	0.0646671
ardeparin	Arteriosclerosis	3	0.0621708
ardeparin	Pulmonary Valve Stenosis	4	0.0617665
ardeparin	Arteriosclerosis Obliterans	5	0.0600709
ardeparin	Vasculitis	6	0.058787
ardeparin	Tachycardia - Atrioventricular Nodal Reentry	7	0.0570038
ardeparin	Thromboangiitis Obliterans	8	0.0486513
ardeparin	Aortic Coarctation	9	0.0461582
ardeparin	Cellulitis	10	0.0455859
arformoterol	Pulmonary Emphysema	1	0.0441471
arformoterol	Toxoplasmosis - Cerebral	2	0.0387613
arformoterol	Cellulitis	3	0.0350506
arformoterol	Otitis Media - Suppurative	4	0.0347175
arformoterol	Abdominal Abscess	5	0.0340101
arformoterol	Neurosyphilis	6	0.0337655
arformoterol	Fungemia	7	0.0314865
arformoterol	Fatigue Syndrome - Chronic	8	0.0311193
arformoterol	Malaria - Cerebral	9	0.0306019
arformoterol	Polyuria	10	0.0298933
argatroban	Hypereosinophilic Syndrome	1	0.0761118
argatroban	Elephantiasis	2	0.0659867
argatroban	Anemia - Megaloblastic	3	0.058983
argatroban	Blood Coagulation Disorders	4	0.0507366
argatroban	Thrombocythemia - Essential	5	0.0503684
argatroban	Myelitis - Transverse	6	0.0376484
argatroban	Toxocariasis	7	0.0375293
argatroban	Polycythemia Vera	8	0.0364595
argatroban	Otitis Media - Suppurative	9	0.0333938
argatroban	Abdominal Abscess	10	0.0326726
aripiprazole	Conduct Disorder	1	0.0648259
aripiprazole	Bipolar Disorder	2	0.0547084
aripiprazole	Attention Deficit Disorder with Hyperactivity	3	0.0508734
aripiprazole	Psychotic Disorders	4	0.0446249
aripiprazole	Myelitis - Transverse	5	0.0407444
aripiprazole	Toxoplasmosis	6	0.0386796
aripiprazole	Cellulitis	7	0.0346406
aripiprazole	Otitis Media - Suppurative	8	0.0346314
aripiprazole	Abdominal Abscess	9	0.0339721
aripiprazole	Neurosyphilis	10	0.0337119
arsenic trioxide	Xerostomia	1	0.665335
arsenic trioxide	Dermatitis - Atopic	2	0.642285
arsenic trioxide	Colonic Neoplasms	3	0.617054
arsenic trioxide	Soft Tissue Neoplasms	4	0.614556
arsenic trioxide	Porphyria - Acute Intermittent	5	0.608507
arsenic trioxide	Muscle Cramp	6	0.605254
arsenic trioxide	Multiple Sclerosis	7	0.602783
arsenic trioxide	AIDS-Related Opportunistic Infections	8	0.590342
arsenic trioxide	Muscle Rigidity	9	0.584757
arsenic trioxide	Myocardial Infarction	10	0.577728
aspirin	Arthritis	1	0.231781
aspirin	Spasms - Infantile	2	0.224302
aspirin	Oral Ulcer	3	0.21161
aspirin	Goiter	4	0.187738
aspirin	Opioid-Related Disorders	5	0.150249
aspirin	Acne Vulgaris	6	0.0941853
aspirin	Gram-Positive Bacterial Infections	7	0.084848
aspirin	Hyperbilirubinemia	8	0.0791969
aspirin	Pharyngitis	9	0.0729066
aspirin	Colitis - Ulcerative	10	0.0637066
atenolol	Surgical Wound Infection	1	0.306016
atenolol	Familial Mediterranean Fever	2	0.25346
atenolol	Constipation	3	0.249369
atenolol	Menstruation Disturbances	4	0.237335
atenolol	Conjunctivitis - Viral	5	0.218403
atenolol	Vaginosis - Bacterial	6	0.211576
atenolol	Myelitis - Transverse	7	0.206806
atenolol	Emaciation	8	0.19275
atenolol	Sunburn	9	0.175767
atenolol	Uveitis - Anterior	10	0.159878
atomoxetine	Complex Regional Pain Syndromes	1	0.0672408
atomoxetine	Bartter Syndrome	2	0.0558719
atomoxetine	Scalp Dermatoses	3	0.0516802
atomoxetine	Psychophysiologic Disorders	4	0.0484721
atomoxetine	Schizophrenia	5	0.0466039
atomoxetine	Mydriasis	6	0.0401894
atomoxetine	Toxoplasmosis	7	0.0395674
atomoxetine	Causalgia	8	0.038833
atomoxetine	Chickenpox	9	0.0382732
atomoxetine	Otitis Media	10	0.0355843
atorvastatin	Coronary Disease	1	0.108014
atorvastatin	Folic Acid Deficiency	2	0.0542417
atorvastatin	Hypercalcemia	3	0.0441176
atorvastatin	Mycoplasma Infections	4	0.0403382
atorvastatin	Tourette Syndrome	5	0.0383105
atorvastatin	Osteosarcoma	6	0.0342243
atorvastatin	Abdominal Abscess	7	0.0336012
atorvastatin	Neurocysticercosis	8	0.0333199
atorvastatin	Cellulitis	9	0.032873
atorvastatin	Fatigue Syndrome - Chronic	10	0.0319825
atovaquone	Toxoplasmosis	1	0.415538
atovaquone	Tourette Syndrome	2	0.0896301
atovaquone	Opisthorchiasis	3	0.0859611
atovaquone	Mansonelliasis	4	0.0853933
atovaquone	Clonorchiasis	5	0.0830233
atovaquone	Trophoblastic Neoplasms	6	0.0803272
atovaquone	Malaria - Avian	7	0.0796669
atovaquone	Enterobiasis	8	0.0741266
atovaquone	Dracunculiasis	9	0.0728651
atovaquone	Torticollis	10	0.0692363
atropine	Arteriosclerosis	1	0.0746972
atropine	Giardiasis	2	0.0664339
atropine	Lice Infestations	3	0.0620755
atropine	Uveitis - Anterior	4	0.0617049
atropine	Pulmonary Edema	5	0.0597855
atropine	Lymphoma	6	0.0587454
atropine	Arteriosclerosis Obliterans	7	0.0557878
atropine	Glaucoma	8	0.0544034
atropine	Nutritional and Metabolic Diseases	9	0.0532399
atropine	Pain - Intractable	10	0.0517816
azatadine	Constipation	1	0.110912
azatadine	Eclampsia	2	0.106016
azatadine	Toothache	3	0.0846747
azatadine	Urinary Tract Infections	4	0.047519
azatadine	Pulmonary Emphysema	5	0.0451444
azatadine	Ear Diseases	6	0.0401003
azatadine	Scleroderma - Systemic	7	0.0400938
azatadine	Mycosis Fungoides	8	0.0389125
azatadine	Polyuria	9	0.0308402
azatadine	Gastroparesis	10	0.0286732
azathioprine	Conjunctivitis	1	0.303182
azathioprine	Gonorrhea	2	0.300755
azathioprine	Autistic Disorder	3	0.204293
azathioprine	Spirochaetales Infections	4	0.195159
azathioprine	Anaphylaxis	5	0.152616
azathioprine	Erectile Dysfunction	6	0.149533
azathioprine	Collagen Diseases	7	0.113997
azathioprine	Pregnancy Complications - Infectious	8	0.111506
azathioprine	Paget Disease - Extramammary	9	0.109855
azathioprine	Chlamydiaceae Infections	10	0.108893
azelaic acid	Rickettsia Infections	1	0.152633
azelaic acid	Sunburn	2	0.0483009
azelaic acid	Growth Disorders	3	0.0480835
azelaic acid	Mydriasis	4	0.0451972
azelaic acid	Photosensitivity Disorders	5	0.0440204
azelaic acid	Seizures - Febrile	6	0.0434069
azelaic acid	Toxoplasmosis	7	0.0417425
azelaic acid	Substance-Related Disorders	8	0.039767
azelaic acid	Meningeal Neoplasms	9	0.0397431
azelaic acid	Endocarditis	10	0.0396699
azelastine	Dyspnea	1	0.116042
azelastine	Osteosarcoma	2	0.100063
azelastine	Glaucoma	3	0.0674421
azelastine	Lymphoma - T-Cell - Cutaneous	4	0.0606787
azelastine	Pulmonary Embolism	5	0.0565506
azelastine	Obsessive-Compulsive Disorder	6	0.0555975
azelastine	Glaucoma - Angle-Closure	7	0.0530533
azelastine	Giardiasis	8	0.0483992
azelastine	Plague	9	0.0475405
azelastine	Schizophrenia	10	0.0460553
azithromycin	Osteomyelitis	1	0.144136
azithromycin	Dyspnea	2	0.143171
azithromycin	Erythrasma	3	0.123475
azithromycin	Onychomycosis	4	0.117781
azithromycin	Proctitis	5	0.111377
azithromycin	Miosis	6	0.110026
azithromycin	Candidiasis - Vulvovaginal	7	0.102369
azithromycin	Oral Ulcer	8	0.0993592
azithromycin	Spasms - Infantile	9	0.0984375
azithromycin	Leishmaniasis	10	0.0959096
aztreonam	Stomach Neoplasms	1	0.0790129
aztreonam	Goiter	2	0.0788994
aztreonam	Seizures - Febrile	3	0.0785479
aztreonam	Sinusitis	4	0.0700275
aztreonam	Candidiasis - Vulvovaginal	5	0.0564877
aztreonam	Infertility - Female	6	0.0564139
aztreonam	Trachoma	7	0.0548184
aztreonam	Infant - Premature - Diseases	8	0.0511325
aztreonam	Candidiasis	9	0.0495489
aztreonam	Pulmonary Edema	10	0.0484921
bacampicillin	Status Epilepticus	1	0.109756
bacampicillin	Sigmoid Diseases	2	0.0750314
bacampicillin	Candidiasis - Vulvovaginal	3	0.0632839
bacampicillin	Candidiasis	4	0.0557562
bacampicillin	Toxoplasmosis - Cerebral	5	0.0517572
bacampicillin	Infertility	6	0.0496605
bacampicillin	Leishmaniasis	7	0.0490389
bacampicillin	Puberty - Precocious	8	0.0470635
bacampicillin	Respiration Disorders	9	0.0444535
bacampicillin	Inappropriate ADH Syndrome	10	0.0427017
bacitracin	Urinary Bladder Neoplasms	1	0.191473
bacitracin	Essential Tremor	2	0.18957
bacitracin	Conjunctivitis	3	0.175161
bacitracin	Blepharospasm	4	0.172351
bacitracin	Scalp Dermatoses	5	0.171547
bacitracin	Gaucher Disease	6	0.161047
bacitracin	Nutritional and Metabolic Diseases	7	0.154488
bacitracin	Lymphoma	8	0.152811
bacitracin	Burns	9	0.14653
bacitracin	Genital Diseases - Female	10	0.13926
baclofen	Epilepsies - Partial	1	0.800769
baclofen	Epilepsy - Tonic-Clonic	2	0.534362
baclofen	Head Injuries - Closed	3	0.349016
baclofen	Epilepsy - Complex Partial	4	0.328442
baclofen	Epilepsy	5	0.287937
baclofen	Epilepsy - Post-Traumatic	6	0.285346
baclofen	Schizophrenia	7	0.277814
baclofen	Epilepsy - Temporal Lobe	8	0.259899
baclofen	Epilepsy - Absence	9	0.216901
baclofen	Cluster Headache	10	0.202953
balsalazide	Liver Cirrhosis	1	0.0617438
balsalazide	Pancreatic Neoplasms	2	0.0516726
balsalazide	Mydriasis	3	0.0401546
balsalazide	Toxoplasmosis	4	0.0382089
balsalazide	Cholelithiasis	5	0.0346963
balsalazide	Otitis Media	6	0.0341266
balsalazide	Abdominal Abscess	7	0.0334625
balsalazide	Neurologic Manifestations	8	0.0332342
balsalazide	Cellulitis	9	0.0324833
balsalazide	Fatigue	10	0.0318226
beclomethasone	Pulmonary Embolism	1	0.0567138
beclomethasone	Dyspnea	2	0.0553197
beclomethasone	Osteosarcoma	3	0.0471672
beclomethasone	Plague	4	0.045438
beclomethasone	Mycoplasma Infections	5	0.041959
beclomethasone	Pruritus	6	0.041744
beclomethasone	Urinary Bladder Neoplasms	7	0.0397692
beclomethasone	Rhinitis	8	0.0363573
beclomethasone	Tachycardia - Ventricular	9	0.0361142
beclomethasone	Polycythemia Vera	10	0.0336356
benazepril	Arteriosclerosis	1	0.0533249
benazepril	Hyperbilirubinemia	2	0.0415723
benazepril	Mycoplasma Infections	3	0.037866
benazepril	Tourette Syndrome	4	0.0376159
benazepril	Osteosarcoma	5	0.0334848
benazepril	Abdominal Abscess	6	0.032764
benazepril	Fatigue	7	0.0301167
benazepril	Foot Dermatoses	8	0.0301032
benazepril	Cellulitis	9	0.0298929
benazepril	Magnesium Deficiency	10	0.0293955
bendroflumethiazide	Neoplasms	1	0.0593443
bendroflumethiazide	Neoplasm Metastasis	2	0.0432154
bendroflumethiazide	Mycoplasma Infections	3	0.0421044
bendroflumethiazide	Nephritis	4	0.037959
bendroflumethiazide	Fatigue	5	0.0317484
bendroflumethiazide	Magnesium Deficiency	6	0.0299549
bendroflumethiazide	Embolism	7	0.029763
bendroflumethiazide	Meningeal Neoplasms	8	0.0284094
bendroflumethiazide	Melanoma	9	0.0277036
bendroflumethiazide	Meningitis - Cryptococcal	10	0.0270167
benzocaine	Ocular Hypertension	1	0.443855
benzocaine	Gangrene	2	0.390359
benzocaine	Osteoarthritis	3	0.341506
benzocaine	Dyspnea	4	0.23423
benzocaine	Fibrocystic Breast Disease	5	0.142995
benzocaine	Thyrotoxicosis	6	0.140457
benzocaine	Substance-Related Disorders	7	0.116705
benzocaine	Pulmonary Emphysema	8	0.101686
benzocaine	Leukocytosis	9	0.100233
benzocaine	Chlamydiaceae Infections	10	0.0998677
benzonatate	Pulmonary Edema	1	0.0415902
benzonatate	Mycosis Fungoides	2	0.0400669
benzonatate	Neuroleptic Malignant Syndrome	3	0.0331127
benzonatate	Fatigue	4	0.0317328
benzonatate	Nephrotic Syndrome	5	0.0301342
benzonatate	Malaria	6	0.0299774
benzonatate	Embolism	7	0.029743
benzonatate	Meningitis - Bacterial	8	0.0284515
benzonatate	Meningeal Neoplasms	9	0.0277176
benzonatate	Meningitis - Haemophilus	10	0.0270975
benzquinamide	Myelitis - Transverse	1	0.0443289
benzquinamide	Neurosyphilis	2	0.0344115
benzquinamide	Fatigue Syndrome - Chronic	3	0.0321202
benzquinamide	Neurocysticercosis	4	0.0314814
benzquinamide	Malaria - Cerebral	5	0.031276
benzquinamide	Meningitis - Pneumococcal	6	0.0297982
benzquinamide	Meningitis - Haemophilus	7	0.0297487
benzquinamide	Encephalitis - Herpes Simplex	8	0.0295773
benzquinamide	Meningitis - Meningococcal	9	0.0294997
benzquinamide	Meningitis - Cryptococcal	10	0.028946
benzthiazide	Mycoplasma Infections	1	0.0395262
benzthiazide	Fatigue	2	0.0313619
benzthiazide	Magnesium Deficiency	3	0.0300094
benzthiazide	Neoplasms - Hormone-Dependent	4	0.0295398
benzthiazide	Embolism	5	0.0290851
benzthiazide	Meningeal Neoplasms	6	0.0284371
benzthiazide	Meningitis - Cryptococcal	7	0.0271399
benzthiazide	Melanoma	8	0.0271179
benzthiazide	Meningitis - Bacterial	9	0.0267114
benzthiazide	Vertigo	10	0.0261099
benztropine	Otitis Media	1	0.0345788
benztropine	Causalgia	2	0.034417
benztropine	Abdominal Abscess	3	0.0338987
benztropine	Foot Dermatoses	4	0.0313605
benztropine	Hypotension - Orthostatic	5	0.0306289
benztropine	Polychondritis - Relapsing	6	0.0300695
benztropine	Respiratory Syncytial Virus Infections	7	0.0300038
benztropine	Dyspepsia	8	0.0299474
benztropine	Soft Tissue Neoplasms	9	0.0279847
benztropine	Proteus Infections	10	0.0267915
bepridil	Adrenal Hyperplasia - Congenital	1	0.0260289
bepridil	Conduct Disorder	2	0.0252846
bepridil	Polycythemia Vera	3	0.0250848
bepridil	Joint Diseases	4	0.0244193
bepridil	Polyuria	5	0.0213159
bepridil	Rhabdomyosarcoma	6	0.0199718
bepridil	Herpes Labialis	7	0.0199062
bepridil	Erectile Dysfunction	8	0.019905
bepridil	Arterial Occlusive Diseases	9	0.0195102
bepridil	Cyanosis	10	0.0192855
betamethasone	Gram-Positive Bacterial Infections	1	0.740861
betamethasone	Arthritis - Juvenile Rheumatoid	2	0.381289
betamethasone	Septicemia	3	0.359633
betamethasone	Reye Syndrome	4	0.349181
betamethasone	Glaucoma - Open-Angle	5	0.34316
betamethasone	Respiratory Distress Syndrome - Newborn	6	0.332956
betamethasone	Hyperbilirubinemia	7	0.275354
betamethasone	Puberty - Precocious	8	0.267918
betamethasone	Dermatitis - Allergic Contact	9	0.24983
betamethasone	Joint Diseases	10	0.241457
betaxolol	Glaucoma - Angle-Closure	1	0.0689564
betaxolol	Lymphoma - Non-Hodgkin	2	0.0586612
betaxolol	Obesity	3	0.0531799
betaxolol	Glaucoma	4	0.0524664
betaxolol	Mycosis Fungoides	5	0.0399053
betaxolol	Schizophrenia	6	0.039704
betaxolol	Toxocariasis	7	0.0395449
betaxolol	Conjunctivitis	8	0.0394277
betaxolol	Cellulitis	9	0.0387199
betaxolol	Otitis Externa	10	0.0355595
bethanechol	Opisthorchiasis	1	0.0752623
bethanechol	Gastroenteritis	2	0.0734184
bethanechol	Liver Cirrhosis	3	0.0555603
bethanechol	Dyspnea	4	0.0554408
bethanechol	Motion Sickness	5	0.0459395
bethanechol	Gastrointestinal Neoplasms	6	0.0430281
bethanechol	Pancreatic Neoplasms	7	0.0428967
bethanechol	Trichinellosis	8	0.0381495
bethanechol	Osteosarcoma	9	0.0366814
bethanechol	Meningococcal Infections	10	0.0303696
bexarotene	Hypereosinophilic Syndrome	1	0.0975874
bexarotene	Elephantiasis	2	0.0902994
bexarotene	Anemia - Megaloblastic	3	0.0839742
bexarotene	Thromboangiitis Obliterans	4	0.0795631
bexarotene	Blood Coagulation Disorders	5	0.0777147
bexarotene	Polychondritis - Relapsing	6	0.0635692
bexarotene	Hypoprothrombinemias	7	0.0554629
bexarotene	Anaphylaxis	8	0.0536837
bexarotene	Histiocytosis	9	0.0522411
bexarotene	Food Hypersensitivity	10	0.0429953
bicalutamide	Toxoplasmosis	1	0.0376664
bicalutamide	Otitis Media - Suppurative	2	0.0335417
bicalutamide	Abdominal Abscess	3	0.032868
bicalutamide	Fatigue Syndrome - Chronic	4	0.031476
bicalutamide	Hypoventilation	5	0.0309223
bicalutamide	Fungemia	6	0.0302579
bicalutamide	Cellulitis	7	0.0301098
bicalutamide	Neurocysticercosis	8	0.0299504
bicalutamide	Encephalitis - Herpes Simplex	9	0.0295902
bicalutamide	Malaria - Cerebral	10	0.029553
bimatoprost	Glaucoma - Angle-Closure	1	0.084587
bimatoprost	Glaucoma	2	0.0826425
bimatoprost	Ocular Hypertension	3	0.0624597
bimatoprost	Macular Edema	4	0.0554869
bimatoprost	Myelitis - Transverse	5	0.0393594
bimatoprost	Toxoplasmosis - Cerebral	6	0.0383311
bimatoprost	Scleritis	7	0.0365508
bimatoprost	Otitis Media - Suppurative	8	0.0342533
bimatoprost	Conjunctivitis	9	0.0339027
bimatoprost	Abdominal Abscess	10	0.0335533
biperiden	Cellulitis	1	0.0350127
biperiden	Otitis Media	2	0.0347218
biperiden	Abdominal Abscess	3	0.0340596
biperiden	Hypotension - Orthostatic	4	0.0315924
biperiden	Foot Dermatoses	5	0.0315575
biperiden	Polychondritis - Relapsing	6	0.0305135
biperiden	Respiratory Syncytial Virus Infections	7	0.0305118
biperiden	Dyspepsia	8	0.0302918
biperiden	Soft Tissue Neoplasms	9	0.0283583
biperiden	Pulmonary Valve Stenosis	10	0.0273274
bismuth subsalicylate	Listeriosis	1	0.0699821
bismuth subsalicylate	Hepatic Encephalopathy	2	0.0667012
bismuth subsalicylate	Goiter	3	0.0664569
bismuth subsalicylate	Stomach Ulcer	4	0.0659257
bismuth subsalicylate	Pain - Postoperative	5	0.0604741
bismuth subsalicylate	Cholelithiasis	6	0.0478075
bismuth subsalicylate	Colonic Diseases - Functional	7	0.0466253
bismuth subsalicylate	Primary Ovarian Insufficiency	8	0.0462951
bismuth subsalicylate	Respiratory Distress Syndrome - Adult	9	0.0462043
bismuth subsalicylate	Colonic Diseases	10	0.0452983
bisoprolol	Arteriosclerosis	1	0.095426
bisoprolol	Vasculitis	2	0.0742177
bisoprolol	Varicose Veins	3	0.0658604
bisoprolol	Endocarditis	4	0.0645134
bisoprolol	Pulmonary Embolism	5	0.055777
bisoprolol	Arteriosclerosis Obliterans	6	0.0463523
bisoprolol	Coronary Disease	7	0.0440593
bisoprolol	Mydriasis	8	0.04035
bisoprolol	Heart Arrest	9	0.0380739
bisoprolol	Condylomata Acuminata	10	0.0272352
bleomycin	Neoplasms - Hormone-Dependent	1	0.183816
bleomycin	Carcinoma - Non-Small-Cell Lung	2	0.183133
bleomycin	Carcinoma - Medullary	3	0.167538
bleomycin	Hirsutism	4	0.165939
bleomycin	Anemia - Megaloblastic	5	0.158618
bleomycin	Edema	6	0.158487
bleomycin	Hypercholesterolemia	7	0.156088
bleomycin	Peritonitis	8	0.155393
bleomycin	Blood Coagulation Disorders	9	0.154204
bleomycin	Enuresis	10	0.153653
bortezomib	Hypereosinophilic Syndrome	1	0.0909499
bortezomib	Elephantiasis	2	0.0826188
bortezomib	Anemia - Megaloblastic	3	0.0759868
bortezomib	Thromboangiitis Obliterans	4	0.0700325
bortezomib	Blood Coagulation Disorders	5	0.0688243
bortezomib	Polychondritis - Relapsing	6	0.0528748
bortezomib	Histiocytosis	7	0.0418908
bortezomib	Toxoplasmosis	8	0.03806
bortezomib	Hypoprothrombinemias	9	0.0379517
bortezomib	Anaphylaxis	10	0.0356971
bosentan	Pulmonary Embolism	1	0.0462644
bosentan	Mydriasis	2	0.0409944
bosentan	Toxoplasmosis	3	0.0386057
bosentan	Otitis Media	4	0.0345548
bosentan	Cellulitis	5	0.0342755
bosentan	Abdominal Abscess	6	0.0339071
bosentan	Neurologic Manifestations	7	0.0336363
bosentan	Fatigue Syndrome - Chronic	8	0.0324776
bosentan	Fungemia	9	0.0313906
bosentan	Neuroblastoma	10	0.0310682
bretylium	Herpes Genitalis	1	0.0927165
bretylium	Toothache	2	0.0724271
bretylium	Pre-Eclampsia	3	0.0628378
bretylium	Myelitis - Transverse	4	0.0412076
bretylium	Arteriosclerosis	5	0.0350446
bretylium	Neurosyphilis	6	0.0334014
bretylium	Fatigue Syndrome - Chronic	7	0.0325741
bretylium	Neurocysticercosis	8	0.0313164
bretylium	Encephalitis - Herpes Simplex	9	0.0310501
bretylium	Constipation	10	0.0304559
brimonidine	Constipation	1	0.113036
brimonidine	Eclampsia	2	0.108133
brimonidine	Herpes Genitalis	3	0.101879
brimonidine	Glaucoma	4	0.0933942
brimonidine	Glaucoma - Angle-Closure	5	0.0910122
brimonidine	Torsades de Pointes	6	0.0867711
brimonidine	Ocular Hypertension	7	0.0661016
brimonidine	Macular Edema	8	0.0593863
brimonidine	Seizures	9	0.0449424
brimonidine	Scleritis	10	0.0416873
brinzolamide	Glaucoma - Angle-Closure	1	0.0595575
brinzolamide	Lymphoma - T-Cell - Cutaneous	2	0.0532865
brinzolamide	Obsessive-Compulsive Disorder	3	0.0476278
brinzolamide	Glaucoma	4	0.0388173
brinzolamide	Mydriasis	5	0.0383525
brinzolamide	Toxoplasmosis	6	0.037536
brinzolamide	Otitis Media	7	0.0333991
brinzolamide	Schizophrenia - Paranoid	8	0.0330615
brinzolamide	Abdominal Abscess	9	0.0326776
brinzolamide	Neurologic Manifestations	10	0.0325499
bromfenac	Polyuria	1	0.0282959
bromfenac	Adrenal Hyperplasia - Congenital	2	0.0280201
bromfenac	Keratitis - Dendritic	3	0.0266449
bromfenac	Endocarditis - Subacute Bacterial	4	0.0264532
bromfenac	Condylomata Acuminata	5	0.0260801
bromfenac	Porphyria Cutanea Tarda	6	0.0244193
bromfenac	Rheumatic Diseases	7	0.0219337
bromfenac	Cystic Fibrosis	8	0.0212538
bromfenac	Precursor Cell Lymphoblastic Leukemia-Lymphoma	9	0.0211002
bromfenac	Erythrasma	10	0.0209725
bromocriptine	Cluster Headache	1	0.155548
bromocriptine	Epilepsy - Absence	2	0.154705
bromocriptine	Thrombocythemia - Essential	3	0.14998
bromocriptine	Epilepsy - Temporal Lobe	4	0.147167
bromocriptine	Epilepsy	5	0.142478
bromocriptine	Schizophrenia	6	0.141716
bromocriptine	Epilepsy - Complex Partial	7	0.139592
bromocriptine	Epilepsy - Post-Traumatic	8	0.133566
bromocriptine	Head Injuries - Closed	9	0.125996
bromocriptine	Sleep Disorders	10	0.125316
bromodiphenhydramine	Miosis	1	0.0967343
bromodiphenhydramine	Atrial Flutter	2	0.084313
bromodiphenhydramine	Scabies	3	0.0818616
bromodiphenhydramine	Complex Regional Pain Syndromes	4	0.0800433
bromodiphenhydramine	Chickenpox	5	0.0756761
bromodiphenhydramine	Attention Deficit and Disruptive Behavior Disorders	6	0.0636209
bromodiphenhydramine	Attention Deficit Disorder with Hyperactivity	7	0.0625449
bromodiphenhydramine	Sarcoma - Kaposi	8	0.0593691
bromodiphenhydramine	Bartter Syndrome	9	0.0591904
bromodiphenhydramine	Stress Disorders - Post-Traumatic	10	0.058052
brompheniramine	Ear Diseases	1	0.119433
brompheniramine	Constipation	2	0.110931
brompheniramine	Eclampsia	3	0.106016
brompheniramine	Otitis Externa	4	0.105385
brompheniramine	Toothache	5	0.0846303
brompheniramine	Pulmonary Emphysema	6	0.0566104
brompheniramine	Pleural Effusion	7	0.0494046
brompheniramine	Scleroderma - Systemic	8	0.0399992
brompheniramine	Polyuria	9	0.0305321
brompheniramine	Gastroparesis	10	0.0288353
buclizine	Ventricular Premature Complexes	1	0.112707
buclizine	Eclampsia	2	0.106227
buclizine	Herpes Genitalis	3	0.0950969
buclizine	Toothache	4	0.0363734
buclizine	Ear Diseases	5	0.028021
buclizine	Adrenal Hyperplasia - Congenital	6	0.0274567
buclizine	Polyuria	7	0.0272638
buclizine	Endocarditis - Subacute Bacterial	8	0.0267976
buclizine	Keratitis - Dendritic	9	0.0265578
buclizine	Condylomata Acuminata	10	0.0264235
budesonide	Dyspnea	1	0.0571336
budesonide	Pulmonary Embolism	2	0.0567616
budesonide	Osteosarcoma	3	0.0497937
budesonide	Plague	4	0.0470866
budesonide	Pruritus	5	0.0436443
budesonide	Mycoplasma Infections	6	0.0431347
budesonide	Urinary Bladder Neck Obstruction	7	0.041682
budesonide	Tachycardia - Supraventricular	8	0.0399073
budesonide	Brain Edema	9	0.0349278
budesonide	Polycythemia Vera	10	0.0338542
bumetanide	Tourette Syndrome	1	0.0705725
bumetanide	Endocarditis - Subacute Bacterial	2	0.0671616
bumetanide	Neisseriaceae Infections	3	0.0634585
bumetanide	Infant - Premature - Diseases	4	0.0615181
bumetanide	Leukemia - Myeloid - Acute	5	0.0598588
bumetanide	Eczema	6	0.053834
bumetanide	Overdose	7	0.0483899
bumetanide	Psychomotor Agitation	8	0.046418
bumetanide	Impotence - Vasculogenic	9	0.04545
bumetanide	Substance Withdrawal Syndrome	10	0.0447453
bupivacaine	Adrenal Hyperplasia - Congenital	1	0.0259045
bupivacaine	Endocarditis - Subacute Bacterial	2	0.0256181
bupivacaine	Condylomata Acuminata	3	0.0254034
bupivacaine	Porphyria Cutanea Tarda	4	0.0246877
bupivacaine	Keratitis - Dendritic	5	0.0242725
bupivacaine	Porphyria - Acute Intermittent	6	0.0208952
bupivacaine	Rheumatic Fever	7	0.0202808
bupivacaine	Erythrasma	8	0.0200496
bupivacaine	Herpes Simplex	9	0.0200308
bupivacaine	Pain - Intractable	10	0.0193067
bupropion	Attention Deficit and Disruptive Behavior Disorders	1	0.17545
bupropion	Autistic Disorder	2	0.166219
bupropion	Child Behavior Disorders	3	0.125149
bupropion	Subarachnoid Hemorrhage	4	0.112739
bupropion	Schizophrenia	5	0.105436
bupropion	Conduct Disorder	6	0.0936744
bupropion	Scalp Dermatoses	7	0.0611027
bupropion	Bipolar Disorder	8	0.0595161
bupropion	Earache	9	0.0585125
bupropion	Psychophysiologic Disorders	10	0.0558539
buspirone	Stroke	1	0.106843
buspirone	Scabies	2	0.102734
buspirone	Attention Deficit and Disruptive Behavior Disorders	3	0.102525
buspirone	Chickenpox	4	0.101299
buspirone	Atrial Flutter	5	0.0918625
buspirone	Attention Deficit Disorder with Hyperactivity	6	0.0918282
buspirone	Complex Regional Pain Syndromes	7	0.0876669
buspirone	Sarcoma - Kaposi	8	0.0610265
buspirone	Bartter Syndrome	9	0.0594331
buspirone	Psoriasis	10	0.0558126
butenafine	Tonsillitis	1	0.116329
butenafine	Eclampsia	2	0.105811
butenafine	Constipation	3	0.0945713
butenafine	Osteolysis	4	0.0571208
butenafine	Spondylolysis	5	0.0529068
butenafine	Arthritis	6	0.0519912
butenafine	Gynecomastia	7	0.0505805
butenafine	Herpes Genitalis	8	0.0474527
butenafine	Pityriasis Rosea	9	0.044868
butenafine	Extravasation of Diagnostic and Therapeutic Materials	10	0.0429285
cabergoline	Spasm	1	0.068
cabergoline	Seizures	2	0.0522271
cabergoline	Epilepsy	3	0.0520109
cabergoline	Epilepsy - Post-Traumatic	4	0.0473378
cabergoline	Epilepsy - Temporal Lobe	5	0.0445834
cabergoline	Head Injuries - Closed	6	0.0415006
cabergoline	Cluster Headache	7	0.0390211
cabergoline	Epilepsy - Absence	8	0.03873
cabergoline	Otitis Media - Suppurative	9	0.0341191
cabergoline	Abdominal Abscess	10	0.03353
caffeine	Endocarditis	1	0.0485677
caffeine	Meningeal Neoplasms	2	0.0474766
caffeine	Pulmonary Embolism	3	0.0455141
caffeine	Mydriasis	4	0.0442977
caffeine	Tachycardia - Ventricular	5	0.0408781
caffeine	Neurologic Manifestations	6	0.0377791
caffeine	Meningitis - Meningococcal	7	0.0374922
caffeine	Meningitis - Haemophilus	8	0.0374546
caffeine	Meningitis - Bacterial	9	0.0368491
caffeine	Fatigue	10	0.0356897
candesartan	Arteriosclerosis	1	0.0556427
candesartan	Hyperbilirubinemia	2	0.0480943
candesartan	Mycoplasma Infections	3	0.0404674
candesartan	Tourette Syndrome	4	0.038307
candesartan	Osteosarcoma	5	0.0342383
candesartan	Abdominal Abscess	6	0.0336337
candesartan	Cellulitis	7	0.0328962
candesartan	Fatigue	8	0.032064
candesartan	Hypoprothrombinemias	9	0.0314861
candesartan	Foot Dermatoses	10	0.0310289
capecitabine	Enterocolitis - Pseudomembranous	1	0.0629719
capecitabine	Listeriosis	2	0.0618273
capecitabine	Mycobacterium avium-intracellulare Infection	3	0.0550334
capecitabine	Pain - Postoperative	4	0.0505138
capecitabine	Leukemia - Myeloid - Accelerated Phase	5	0.0440493
capecitabine	Carcinoma - Islet Cell	6	0.0417546
capecitabine	Lymphoma	7	0.041485
capecitabine	Toxocariasis	8	0.0395394
capecitabine	Otitis Externa	9	0.0355748
capecitabine	Abdominal Abscess	10	0.0349396
captopril	Huntington Disease	1	0.135137
captopril	Substance Withdrawal Syndrome	2	0.103847
captopril	Arteriosclerosis	3	0.0964206
captopril	Uterine Neoplasms	4	0.0879805
captopril	Psychotic Disorders	5	0.0870183
captopril	Arteriosclerosis Obliterans	6	0.079271
captopril	Elephantiasis	7	0.0765474
captopril	Tetralogy of Fallot	8	0.0653091
captopril	Hand Dermatoses	9	0.0601709
captopril	Arterial Occlusive Diseases	10	0.0457913
carbachol	Ocular Hypertension	1	0.167684
carbachol	Glaucoma - Angle-Closure	2	0.14787
carbachol	Glaucoma - Open-Angle	3	0.108757
carbachol	Gaucher Disease	4	0.0987401
carbachol	Macular Edema	5	0.072854
carbachol	Scleritis	6	0.0642856
carbachol	Eye Diseases	7	0.0636159
carbachol	Blepharospasm	8	0.0593028
carbachol	Conjunctivitis	9	0.0523977
carbachol	Myelitis - Transverse	10	0.0438312
carbamazepine	Pain - Postoperative	1	0.231111
carbamazepine	Earache	2	0.160481
carbamazepine	Autistic Disorder	3	0.156023
carbamazepine	Attention Deficit and Disruptive Behavior Disorders	4	0.155554
carbamazepine	Clostridium Infections	5	0.144302
carbamazepine	Epilepsy	6	0.141539
carbamazepine	Chickenpox	7	0.136305
carbamazepine	Skin Diseases - Infectious	8	0.120241
carbamazepine	Sarcoma	9	0.119047
carbamazepine	Scalp Dermatoses	10	0.117843
carbidopa	Parkinson Disease - Postencephalitic	1	0.108271
carbidopa	Parkinsonian Disorders	2	0.105154
carbidopa	Cellulitis	3	0.0403976
carbidopa	Otitis Media - Suppurative	4	0.0359515
carbidopa	Abdominal Abscess	5	0.0352926
carbidopa	Surgical Wound Infection	6	0.0339018
carbidopa	Fungemia	7	0.0329126
carbidopa	Hypoventilation	8	0.0326777
carbidopa	Pruritus Ani	9	0.0319524
carbidopa	Polyuria	10	0.0317999
carbinoxamine	Ear Diseases	1	0.117421
carbinoxamine	Otitis Externa	2	0.102129
carbinoxamine	Pulmonary Emphysema	3	0.056573
carbinoxamine	Pleural Effusion	4	0.0483163
carbinoxamine	Polyuria	5	0.0300944
carbinoxamine	Gastroparesis	6	0.0283002
carbinoxamine	Reye Syndrome	7	0.0275769
carbinoxamine	Miosis	8	0.0274914
carbinoxamine	Rhinitis	9	0.0267794
carbinoxamine	Neoplasm Metastasis	10	0.0266631
carmustine	Leprosy - Borderline	1	0.307896
carmustine	Endocarditis - Subacute Bacterial	2	0.270769
carmustine	Enterocolitis - Pseudomembranous	3	0.27032
carmustine	Parkinsonian Disorders	4	0.268681
carmustine	Herpes Zoster Ophthalmicus	5	0.264099
carmustine	Neoplasms - Hormone-Dependent	6	0.263782
carmustine	Heart Failure	7	0.262473
carmustine	Carcinoma - Small Cell	8	0.255408
carmustine	Pneumococcal Infections	9	0.24911
carmustine	Tachycardia - Paroxysmal	10	0.244882
carnitine	Hypercholesterolemia	1	0.0553778
carnitine	Myelitis - Transverse	2	0.0430492
carnitine	Toxoplasmosis	3	0.0396609
carnitine	Cellulitis	4	0.0392326
carnitine	Otitis Media	5	0.0357086
carnitine	Abdominal Abscess	6	0.0350818
carnitine	Neurosyphilis	7	0.03472
carnitine	Fatigue Syndrome - Chronic	8	0.0341323
carnitine	Hypoventilation	9	0.0340105
carnitine	Sunburn	10	0.033574
carteolol	Glaucoma - Angle-Closure	1	0.0646082
carteolol	Lymphoma - Non-Hodgkin	2	0.0561513
carteolol	Obesity	3	0.0505922
carteolol	Glaucoma	4	0.0459584
carteolol	Mycosis Fungoides	5	0.0391569
carteolol	Toxocariasis	6	0.0386028
carteolol	Schizophrenia	7	0.0365939
carteolol	Conjunctivitis	8	0.0350837
carteolol	Otitis Externa	9	0.0345473
carteolol	Cellulitis	10	0.0342897
carvedilol	Arterial Occlusive Diseases	1	0.0704521
carvedilol	Surgical Wound Infection	2	0.0481177
carvedilol	Vaginosis - Bacterial	3	0.035442
carvedilol	Encephalitis - Herpes Simplex	4	0.0324404
carvedilol	Puberty - Precocious	5	0.0275156
carvedilol	Conduct Disorder	6	0.0263205
carvedilol	Adrenal Hyperplasia - Congenital	7	0.0260573
carvedilol	Irritable Bowel Syndrome	8	0.0245005
carvedilol	Poisoning	9	0.0242839
carvedilol	Restless Legs Syndrome	10	0.0225304
cefaclor	Oral Ulcer	1	0.162252
cefaclor	Growth Disorders	2	0.140414
cefaclor	Phobic Disorders	3	0.13606
cefaclor	Candidiasis - Chronic Mucocutaneous	4	0.128384
cefaclor	Dyspnea	5	0.126513
cefaclor	Seizures	6	0.125757
cefaclor	Soft Tissue Neoplasms	7	0.125066
cefaclor	Osteomyelitis	8	0.113851
cefaclor	Shock - Cardiogenic	9	0.111939
cefaclor	Candidiasis - Oral	10	0.102968
cefadroxil	Onychomycosis	1	0.100529
cefadroxil	Mesothelioma	2	0.0841655
cefadroxil	Gynecomastia	3	0.0818835
cefadroxil	Status Asthmaticus	4	0.0794971
cefadroxil	Goiter	5	0.0791158
cefadroxil	Sialorrhea	6	0.0753453
cefadroxil	Ear Diseases	7	0.069888
cefadroxil	Candidiasis - Vulvovaginal	8	0.0677438
cefadroxil	Candidiasis	9	0.061292
cefadroxil	Legionnaires Disease	10	0.0542115
cefamandole	Sporotrichosis	1	0.110899
cefamandole	Opisthorchiasis	2	0.110176
cefamandole	Soft Tissue Neoplasms	3	0.106996
cefamandole	Shock - Septic	4	0.105237
cefamandole	Candidiasis - Oral	5	0.102424
cefamandole	Seizures - Febrile	6	0.0982533
cefamandole	Candidiasis - Chronic Mucocutaneous	7	0.0974183
cefamandole	Campylobacter Infections	8	0.0932156
cefamandole	Leg Dermatoses	9	0.0897611
cefamandole	Conjunctivitis	10	0.0871609
cefazolin	Bulimia	1	0.136021
cefazolin	Opisthorchiasis	2	0.108483
cefazolin	Candidiasis - Oral	3	0.102155
cefazolin	Gram-Positive Bacterial Infections	4	0.100536
cefazolin	Seizures - Febrile	5	0.0991213
cefazolin	Pulmonary Emphysema	6	0.0970625
cefazolin	Candidiasis - Chronic Mucocutaneous	7	0.0962743
cefazolin	Conjunctivitis	8	0.0955092
cefazolin	Campylobacter Infections	9	0.0952102
cefazolin	Leg Dermatoses	10	0.0927208
cefdinir	Osteosarcoma	1	0.324893
cefdinir	Bronchial Spasm	2	0.293458
cefdinir	Ear Diseases	3	0.23837
cefdinir	Otitis Externa	4	0.236271
cefdinir	Plague	5	0.182974
cefdinir	Spondylitis - Ankylosing	6	0.176036
cefdinir	Opisthorchiasis	7	0.123521
cefdinir	Osteolysis	8	0.120062
cefdinir	Motion Sickness	9	0.118975
cefdinir	Spinal Cord Injuries	10	0.118232
cefditoren	Spirochaetales Infections	1	0.220541
cefditoren	Photosensitivity Disorders	2	0.141703
cefditoren	Gynecomastia	3	0.13357
cefditoren	Opioid-Related Disorders	4	0.110806
cefditoren	Proctocolitis	5	0.101455
cefditoren	Miosis	6	0.0996997
cefditoren	Candidiasis - Oral	7	0.0930233
cefditoren	Goiter	8	0.0794442
cefditoren	Spondylitis - Ankylosing	9	0.0792011
cefditoren	Campylobacter Infections	10	0.0790638
cefepime	Raynaud Disease	1	0.211162
cefepime	Seizures - Febrile	2	0.201426
cefepime	Respiratory Tract Diseases	3	0.189
cefepime	Pleural Effusion	4	0.186002
cefepime	Anorexia	5	0.185975
cefepime	Muscle Cramp	6	0.184294
cefepime	Muscle Spasticity	7	0.179559
cefepime	Legionnaires Disease	8	0.176523
cefepime	Myasthenia Gravis	9	0.170517
cefepime	Restless Legs Syndrome	10	0.169837
cefixime	Primary Ovarian Insufficiency	1	0.151872
cefixime	Candidiasis - Chronic Mucocutaneous	2	0.129599
cefixime	Seizures - Febrile	3	0.12865
cefixime	Opioid-Related Disorders	4	0.126283
cefixime	Soft Tissue Neoplasms	5	0.125989
cefixime	Nutritional and Metabolic Diseases	6	0.111077
cefixime	Shock - Septic	7	0.110014
cefixime	Conjunctivitis	8	0.109072
cefixime	Conjunctivitis - Bacterial	9	0.107989
cefixime	Photosensitivity Disorders	10	0.105256
cefoperazone	Opisthorchiasis	1	0.141028
cefoperazone	Candidiasis - Cutaneous	2	0.139106
cefoperazone	Scleritis	3	0.138472
cefoperazone	Sleep Disorders	4	0.13138
cefoperazone	Obesity	5	0.122207
cefoperazone	Rectal Neoplasms	6	0.121918
cefoperazone	Anthrax	7	0.120166
cefoperazone	Sepsis	8	0.115919
cefoperazone	Conjunctivitis - Acute Hemorrhagic	9	0.114592
cefoperazone	Conjunctivitis - Viral	10	0.113709
cefotaxime	Bacterial Infections	1	0.326589
cefotaxime	Respiratory Tract Diseases	2	0.323672
cefotaxime	Respiratory Tract Fistula	3	0.312064
cefotaxime	Muscle Rigidity	4	0.276158
cefotaxime	Sarcoma - Ewings	5	0.271415
cefotaxime	Respiratory Tract Infections	6	0.256964
cefotaxime	Multiple Myeloma	7	0.249447
cefotaxime	Respiratory Syncytial Virus Infections	8	0.247739
cefotaxime	Pityriasis Rosea	9	0.243626
cefotaxime	Bronchial Neoplasms	10	0.231854
cefotetan	Bronchial Spasm	1	0.267631
cefotetan	Pheochromocytoma	2	0.210314
cefotetan	Scleritis	3	0.20797
cefotetan	Psychotic Disorders	4	0.206825
cefotetan	Anorexia	5	0.175258
cefotetan	Respiratory Distress Syndrome - Adult	6	0.163235
cefotetan	Multiple Sclerosis	7	0.149939
cefotetan	Scabies	8	0.145228
cefotetan	Cachexia	9	0.144579
cefotetan	Neurosyphilis	10	0.137163
cefoxitin	Photophobia	1	0.208964
cefoxitin	Seizures	2	0.201251
cefoxitin	Anorexia	3	0.161165
cefoxitin	Bacterial Infections	4	0.158909
cefoxitin	Schizophrenia	5	0.14444
cefoxitin	Candidiasis	6	0.144129
cefoxitin	Onychomycosis	7	0.132006
cefoxitin	Nocardia Infections	8	0.131953
cefoxitin	Brucellosis	9	0.128656
cefoxitin	Muscle Rigidity	10	0.120023
cefpodoxime	Phobic Disorders	1	0.143255
cefpodoxime	Dyspnea	2	0.137255
cefpodoxime	Osteolysis	3	0.133595
cefpodoxime	Candidiasis - Chronic Mucocutaneous	4	0.124826
cefpodoxime	Opisthorchiasis	5	0.124307
cefpodoxime	Seizures	6	0.123569
cefpodoxime	Glioblastoma	7	0.119869
cefpodoxime	Onchocerciasis	8	0.111625
cefpodoxime	Conjunctivitis	9	0.103249
cefpodoxime	Candidiasis - Oral	10	0.102913
cefprozil	Osteomyelitis	1	0.253158
cefprozil	Dyspnea	2	0.211685
cefprozil	Phobic Disorders	3	0.118099
cefprozil	Erythrasma	4	0.117689
cefprozil	Onychomycosis	5	0.10385
cefprozil	Candidiasis - Oral	6	0.100952
cefprozil	Mesothelioma	7	0.0891414
cefprozil	Oral Ulcer	8	0.0882229
cefprozil	Campylobacter Infections	9	0.0844623
cefprozil	Soft Tissue Infections	10	0.0844559
ceftazidime	Raynaud Disease	1	0.212105
ceftazidime	Seizures - Febrile	2	0.203253
ceftazidime	Anorexia	3	0.180837
ceftazidime	Erectile Dysfunction	4	0.169047
ceftazidime	Respiratory Tract Diseases	5	0.161688
ceftazidime	Muscle Spasticity	6	0.157912
ceftazidime	Muscle Rigidity	7	0.155561
ceftazidime	Premenstrual Syndrome	8	0.154363
ceftazidime	Legionnaires Disease	9	0.153438
ceftazidime	Schizophrenia - Paranoid	10	0.145333
ceftibuten	Dyspnea	1	0.128777
ceftibuten	Osteolysis	2	0.118892
ceftibuten	Onchocerciasis	3	0.102934
ceftibuten	Mental Retardation	4	0.0878857
ceftibuten	Glioblastoma	5	0.0779475
ceftibuten	Phobic Disorders	6	0.0772782
ceftibuten	Sialorrhea	7	0.0726868
ceftibuten	Psychotic Disorders	8	0.0571005
ceftibuten	Campylobacter Infections	9	0.0454641
ceftibuten	Leg Dermatoses	10	0.0378178
ceftizoxime	Photosensitivity Disorders	1	0.254264
ceftizoxime	Scalp Dermatoses	2	0.239193
ceftizoxime	Respiratory Tract Infections	3	0.230324
ceftizoxime	Pleural Effusion	4	0.230196
ceftizoxime	Muscle Rigidity	5	0.219136
ceftizoxime	Multiple Myeloma	6	0.218977
ceftizoxime	Respiratory Tract Fistula	7	0.218001
ceftizoxime	Rectal Neoplasms	8	0.217826
ceftizoxime	Reye Syndrome	9	0.214414
ceftizoxime	Restless Legs Syndrome	10	0.20757
ceftriaxone	Panic Disorder	1	0.718493
ceftriaxone	Respiration Disorders	2	0.331917
ceftriaxone	Respiratory Distress Syndrome,Adult	3	0.321683
ceftriaxone	Rickettsia Infections	4	0.308086
ceftriaxone	Respiratory Distress Syndrome,Newborn	5	0.288701
ceftriaxone	Bacteroides Infections	6	0.281529
ceftriaxone	Bone Diseases,Infectious	7	0.266634
ceftriaxone	Multiple Myeloma	8	0.265247
ceftriaxone	Rectal Neoplasms	9	0.264844
ceftriaxone	Maxillary Sinusitis	10	0.247944
cefuroxime	Peptic Ulcer	1	0.511134
cefuroxime	Hypotension - Orthostatic	2	0.202886
cefuroxime	Spinal Cord Ischemia	3	0.195054
cefuroxime	Respiratory Distress Syndrome - Adult	4	0.176991
cefuroxime	Osteolysis	5	0.167654
cefuroxime	Dyspnea	6	0.165692
cefuroxime	Proctitis	7	0.154104
cefuroxime	Bulimia	8	0.14127
cefuroxime	Growth Disorders	9	0.140744
cefuroxime	Candidiasis - Chronic Mucocutaneous	10	0.140291
celecoxib	Oral Ulcer	1	0.0902051
celecoxib	Arteriosclerosis Obliterans	2	0.0799947
celecoxib	Spinal Cord Ischemia	3	0.0712451
celecoxib	Impetigo	4	0.0627719
celecoxib	Lice Infestations	5	0.0618786
celecoxib	Pain	6	0.0518685
celecoxib	Mycobacterium Infections - Atypical	7	0.0498485
celecoxib	Lyme Disease	8	0.0358543
celecoxib	Chlamydia Infections	9	0.0351122
celecoxib	Opioid-Related Disorders	10	0.027119
cephalexin	Bulimia	1	0.258074
cephalexin	Pulmonary Emphysema	2	0.19673
cephalexin	Shock - Septic	3	0.11179
cephalexin	Oral Ulcer	4	0.105633
cephalexin	Candidiasis - Oral	5	0.102267
cephalexin	Spasm	6	0.101723
cephalexin	Growth Disorders	7	0.100552
cephalexin	Onychomycosis	8	0.0986724
cephalexin	Seizures - Febrile	9	0.090584
cephalexin	Campylobacter Infections	10	0.0902924
cephalothin	Prostatic Neoplasms	1	0.129116
cephalothin	Gynecomastia	2	0.0995203
cephalothin	Candidiasis - Vulvovaginal	3	0.0966784
cephalothin	Goiter	4	0.0793743
cephalothin	Candidiasis	5	0.0767246
cephalothin	Leishmaniasis	6	0.0702471
cephalothin	Osteoarthritis	7	0.0627384
cephalothin	Spasms - Infantile	8	0.0617505
cephalothin	Conjunctivitis - Acute Hemorrhagic	9	0.0595717
cephalothin	Serratia Infections	10	0.0474166
cephapirin	Prostatitis	1	0.14055
cephapirin	Status Epilepticus	2	0.110955
cephapirin	Haemophilus Infections	3	0.0999886
cephapirin	Candidiasis - Vulvovaginal	4	0.0980259
cephapirin	Candidiasis	5	0.0802052
cephapirin	Gonorrhea	6	0.0794292
cephapirin	Leishmaniasis - Visceral	7	0.0745838
cephapirin	Osteolysis	8	0.070048
cephapirin	Spinal Cord Ischemia	9	0.0687055
cephapirin	Conjunctivitis - Acute Hemorrhagic	10	0.0659292
cephradine	Gynecomastia	1	0.0997576
cephradine	Candidiasis - Vulvovaginal	2	0.0973148
cephradine	Goiter	3	0.0794097
cephradine	Candidiasis	4	0.0783464
cephradine	Leishmaniasis	5	0.072864
cephradine	Osteoarthritis	6	0.0659617
cephradine	Spasms - Infantile	7	0.0649805
cephradine	Conjunctivitis - Acute Hemorrhagic	8	0.0623693
cephradine	Septicemia	9	0.0505812
cephradine	Puberty - Precocious	10	0.0473373
cetirizine	Pulmonary Emphysema	1	0.0446477
cetirizine	Ear Diseases	2	0.0375282
cetirizine	Mycosis Fungoides	3	0.0371752
cetirizine	Polyuria	4	0.0303578
cetirizine	Rhinitis - Vasomotor	5	0.0291268
cetirizine	Gastroparesis	6	0.0283295
cetirizine	Reye Syndrome	7	0.0280399
cetirizine	Miosis	8	0.0274033
cetirizine	Tyrosinemias	9	0.0271053
cetirizine	Neoplasm Metastasis	10	0.0269054
cevimeline	Oral Ulcer	1	0.0647013
cevimeline	Myelitis - Transverse	2	0.0411841
cevimeline	Toxoplasmosis - Cerebral	3	0.0377759
cevimeline	Otitis Media - Suppurative	4	0.0336695
cevimeline	Abdominal Abscess	5	0.0329791
cevimeline	Neurosyphilis	6	0.0328155
cevimeline	Fatigue Syndrome - Chronic	7	0.0324177
cevimeline	Hypoventilation	8	0.0323469
cevimeline	Neurocysticercosis	9	0.0314061
cevimeline	Encephalitis - Herpes Simplex	10	0.0311834
chloramphenicol	Staphylococcal Skin Infections	1	0.110012
chloramphenicol	Urinary Incontinence	2	0.0866158
chloramphenicol	Glaucoma	3	0.0865137
chloramphenicol	Lymphoma - Non-Hodgkin	4	0.0863586
chloramphenicol	Eye Diseases	5	0.0843429
chloramphenicol	Nutritional and Metabolic Diseases	6	0.0826473
chloramphenicol	Esotropia	7	0.0822794
chloramphenicol	Blepharospasm	8	0.0818489
chloramphenicol	Sarcoma - Ewings	9	0.0806841
chloramphenicol	Goiter	10	0.0791506
chloroprocaine	Adrenal Hyperplasia - Congenital	1	0.0264607
chloroprocaine	Endocarditis - Subacute Bacterial	2	0.0261495
chloroprocaine	Condylomata Acuminata	3	0.025857
chloroprocaine	Porphyria Cutanea Tarda	4	0.0255253
chloroprocaine	Keratitis - Dendritic	5	0.0249706
chloroprocaine	Porphyria - Acute Intermittent	6	0.0216559
chloroprocaine	Rheumatic Fever	7	0.0213938
chloroprocaine	Erythrasma	8	0.0206518
chloroprocaine	Herpes Simplex	9	0.0205584
chloroprocaine	Cystic Fibrosis	10	0.019891
chloroquine	Macular Edema	1	0.226065
chloroquine	Toxoplasmosis	2	0.187651
chloroquine	Trichinellosis	3	0.177919
chloroquine	Myositis	4	0.177181
chloroquine	Earache	5	0.175977
chloroquine	Hot Flashes	6	0.175195
chloroquine	Tourette Syndrome	7	0.17378
chloroquine	Enteritis	8	0.172667
chloroquine	Malaria - Cerebral	9	0.170974
chloroquine	Diarrhea	10	0.169647
chlorothiazide	Mycosis Fungoides	1	0.0404261
chlorothiazide	Elephantiasis	2	0.0371115
chlorothiazide	Encephalitis - Herpes Simplex	3	0.0363492
chlorothiazide	Fatigue Syndrome - Chronic	4	0.0320892
chlorothiazide	Nephritis	5	0.0304968
chlorothiazide	Malaria	6	0.0304843
chlorothiazide	Meningitis - Bacterial	7	0.0289588
chlorothiazide	Echinococcosis	8	0.028672
chlorothiazide	Meningeal Neoplasms	9	0.0285432
chlorothiazide	Meningitis - Haemophilus	10	0.0280917
chlorotrianisene	Thromboembolism	1	0.118201
chlorotrianisene	Thyroid Crisis	2	0.0867202
chlorotrianisene	Adrenal Insufficiency	3	0.085056
chlorotrianisene	Psychophysiologic Disorders	4	0.0784328
chlorotrianisene	Hyperparathyroidism	5	0.0633125
chlorotrianisene	Psychomotor Agitation	6	0.0621933
chlorotrianisene	Infertility - Female	7	0.0606476
chlorotrianisene	Trachoma	8	0.0595878
chlorotrianisene	Infant - Premature - Diseases	9	0.0565674
chlorotrianisene	Endometrial Hyperplasia	10	0.0508467
chlorpheniramine	Conjunctivitis - Viral	1	0.110611
chlorpheniramine	Echinococcosis	2	0.105733
chlorpheniramine	Tonsillitis	3	0.084526
chlorpheniramine	Mycoplasma Infections	4	0.0678854
chlorpheniramine	Pulmonary Embolism	5	0.0561977
chlorpheniramine	Scleritis	6	0.0398084
chlorpheniramine	Dyspnea	7	0.0397439
chlorpheniramine	Plague	8	0.031473
chlorpheniramine	Lymphoma - Non-Hodgkin	9	0.0311428
chlorpheniramine	Polycythemia Vera	10	0.0301288
chlorpromazine	Stomach Ulcer	1	0.145381
chlorpromazine	Attention Deficit Disorder with Hyperactivity	2	0.140441
chlorpromazine	Chancroid	3	0.124835
chlorpromazine	Salmonella Infections	4	0.115562
chlorpromazine	Ear Diseases	5	0.106469
chlorpromazine	Atrial Flutter	6	0.0938866
chlorpromazine	Community-Acquired Infections	7	0.0931383
chlorpromazine	Clostridium Infections	8	0.0911205
chlorpromazine	Peritonitis	9	0.084121
chlorpromazine	Staphylococcal Skin Infections	10	0.0819817
chlorpropamide	Hypercalcemia	1	0.0452562
chlorpropamide	Mydriasis	2	0.0393718
chlorpropamide	Toxoplasmosis	3	0.0380835
chlorpropamide	Otitis Media	4	0.0339924
chlorpropamide	Abdominal Abscess	5	0.0332983
chlorpropamide	Neurologic Manifestations	6	0.0331187
chlorpropamide	Cellulitis	7	0.0320061
chlorpropamide	Fatigue	8	0.0312477
chlorpropamide	Foot Dermatoses	9	0.0307264
chlorpropamide	Hypotension - Orthostatic	10	0.0303506
chlorprothixene	Herpes Genitalis	1	0.0976968
chlorprothixene	Attention Deficit Disorder with Hyperactivity	2	0.0861304
chlorprothixene	Child Behavior Disorders	3	0.0833751
chlorprothixene	Conduct Disorder	4	0.0823486
chlorprothixene	Attention Deficit and Disruptive Behavior Disorders	5	0.0738236
chlorprothixene	Autistic Disorder	6	0.0723401
chlorprothixene	Subarachnoid Hemorrhage	7	0.0669824
chlorprothixene	Schizophrenia	8	0.0599576
chlorprothixene	Bipolar Disorder	9	0.0591846
chlorprothixene	Cocaine-Related Disorders	10	0.0423808
chlorthalidone	Mycoplasma Infections	1	0.0408115
chlorthalidone	Fatigue	2	0.0322909
chlorthalidone	Neoplasms - Hormone-Dependent	3	0.0309178
chlorthalidone	Embolism	4	0.030588
chlorthalidone	Magnesium Deficiency	5	0.0302247
chlorthalidone	Melanoma	6	0.0287827
chlorthalidone	Meningeal Neoplasms	7	0.0287403
chlorthalidone	Meningitis - Cryptococcal	8	0.0275835
chlorthalidone	Vertigo	9	0.0272867
chlorthalidone	Meningitis - Bacterial	10	0.0270968
chlorzoxazone	Cluster Headache	1	0.163691
chlorzoxazone	Epilepsy - Absence	2	0.159413
chlorzoxazone	Osteoarthritis	3	0.14103
chlorzoxazone	Epilepsy - Complex Partial	4	0.134931
chlorzoxazone	Epilepsy - Temporal Lobe	5	0.126628
chlorzoxazone	Sleep Disorders	6	0.122001
chlorzoxazone	Schizophrenia - Paranoid	7	0.0906701
chlorzoxazone	Epilepsy - Tonic-Clonic	8	0.0882731
chlorzoxazone	Epilepsy	9	0.0879486
chlorzoxazone	Epilepsy - Post-Traumatic	10	0.0754611
ciclesonide	Causalgia	1	0.0553068
ciclesonide	Sunburn	2	0.0534957
ciclesonide	Seizures - Febrile	3	0.0510045
ciclesonide	Endocarditis	4	0.0485306
ciclesonide	Meningeal Neoplasms	5	0.0476323
ciclesonide	Pulmonary Embolism	6	0.0472863
ciclesonide	Pruritus	7	0.044329
ciclesonide	Toxoplasmosis	8	0.0427126
ciclesonide	Urinary Bladder Neoplasms	9	0.0424052
ciclesonide	Tachycardia - Ventricular	10	0.0413253
cidofovir	Cytomegalovirus Infections	1	0.517006
cidofovir	Respiratory Distress Syndrome - Newborn	2	0.11
cidofovir	Opioid-Related Disorders	3	0.0952644
cidofovir	Chromoblastomycosis	4	0.0929018
cidofovir	Malignant Hyperthermia	5	0.0920534
cidofovir	Malaria	6	0.0881376
cidofovir	Diverticulitis	7	0.0828597
cidofovir	Enterobacteriaceae Infections	8	0.0806696
cidofovir	Glaucoma	9	0.0802352
cidofovir	Huntington Disease	10	0.076061
cilastatin	Dyspepsia	1	0.0295259
cilastatin	Polycythemia Vera	2	0.0295067
cilastatin	Respiratory Tract Diseases	3	0.0293101
cilastatin	Hypotension - Orthostatic	4	0.0291166
cilastatin	Gastrointestinal Neoplasms	5	0.0271459
cilastatin	Mesothelioma	6	0.0267911
cilastatin	Dysentery - Bacillary	7	0.0266374
cilastatin	Torsades de Pointes	8	0.0265421
cilastatin	Pruritus	9	0.0264248
cilastatin	Coronary Disease	10	0.0259641
cilostazol	Peptic Ulcer	1	0.232072
cilostazol	Porphyria - Acute Intermittent	2	0.100986
cilostazol	Radiation Injuries - Experimental	3	0.0975861
cilostazol	Arteriosclerosis	4	0.0422661
cilostazol	Mydriasis	5	0.0401704
cilostazol	Neurologic Manifestations	6	0.0338896
cilostazol	Fatigue Syndrome - Chronic	7	0.0319783
cilostazol	Malaria - Avian	8	0.0307632
cilostazol	Neuroblastoma	9	0.0300793
cilostazol	Encephalitis - Herpes Simplex	10	0.029611
cimetidine	Leukemia - Myeloid - Acute	1	0.390083
cimetidine	Parkinson Disease	2	0.382313
cimetidine	Colitis - Ulcerative	3	0.321399
cimetidine	Fever	4	0.274815
cimetidine	Esophageal Diseases	5	0.257918
cimetidine	Intracranial Embolism and Thrombosis	6	0.24672
cimetidine	Serratia Infections	7	0.239881
cimetidine	Colonic Diseases - Functional	8	0.226633
cimetidine	Pregnancy Complications - Infectious	9	0.223981
cimetidine	Erythrasma	10	0.220331
cinoxacin	Hypoventilation	1	0.0328412
cinoxacin	Respiratory Tract Fistula	2	0.0314576
cinoxacin	Dyspnea	3	0.0310294
cinoxacin	Gastroparesis	4	0.0298747
cinoxacin	Pruritus Ani	5	0.0294974
cinoxacin	Purpura - Thrombocytopenic - Idiopathic	6	0.0290477
cinoxacin	Miosis	7	0.0289035
cinoxacin	Neoplasm Metastasis	8	0.0284104
cinoxacin	Catatonia	9	0.0281848
cinoxacin	Photophobia	10	0.0276969
ciprofloxacin	Conjunctivitis,Bacterial	1	0.301034
ciprofloxacin	Chlamydia Infections	2	0.207072
ciprofloxacin	Thrombocytopenic,Idiopathic	3	0.206748
ciprofloxacin	Acanthamoeba Keratitis	4	0.191929
ciprofloxacin	Scalp Dermatoses	5	0.144865
ciprofloxacin	Campylobacter Infections	6	0.137195
ciprofloxacin	Neurocysticercosis	7	0.136484
ciprofloxacin	Respiration Disorders	8	0.134665
ciprofloxacin	Anthrax	9	0.134242
ciprofloxacin	Skin Diseases	10	0.128198
citalopram	Dyspnea	1	0.154913
citalopram	Attention Deficit and Disruptive Behavior Disorders	2	0.153904
citalopram	Stress Disorders - Post-Traumatic	3	0.153801
citalopram	Pain - Intractable	4	0.151523
citalopram	Attention Deficit Disorder with Hyperactivity	5	0.148689
citalopram	Thyrotoxicosis	6	0.14867
citalopram	Chickenpox	7	0.137635
citalopram	Stomach Neoplasms	8	0.137
citalopram	Sarcoma - Kaposi	9	0.118143
citalopram	Peritonitis	10	0.106809
cladribine	Graft vs Host Disease	1	0.310209
cladribine	Neuroleptic Malignant Syndrome	2	0.25872
cladribine	Hematologic Diseases	3	0.255627
cladribine	Conjunctivitis - Allergic	4	0.249739
cladribine	Autoimmune Diseases	5	0.248384
cladribine	Histiocytosis	6	0.246233
cladribine	Pneumonia - Pneumocystis	7	0.238241
cladribine	Tetralogy of Fallot	8	0.230754
cladribine	Blood Coagulation Disorders	9	0.224298
cladribine	Tetanus	10	0.218978
clemastine	Pulmonary Emphysema	1	0.0450974
clemastine	Ear Diseases	2	0.0398931
clemastine	Mycosis Fungoides	3	0.038811
clemastine	Polyuria	4	0.0303804
clemastine	Gastroparesis	5	0.0285902
clemastine	Miosis	6	0.0278163
clemastine	Neoplasm Metastasis	7	0.0269604
clemastine	Dyskinesia - Drug-Induced	8	0.0268176
clemastine	Torsades de Pointes	9	0.0267835
clemastine	Adrenal Hyperplasia - Congenital	10	0.026452
clidinium	Crohn Disease	1	0.135731
clidinium	Liver Cirrhosis - Biliary	2	0.100953
clidinium	Pancreatitis	3	0.100827
clidinium	Cholelithiasis	4	0.084626
clidinium	Sialorrhea	5	0.0643175
clidinium	Irritable Bowel Syndrome	6	0.0643108
clidinium	Hepatitis C - Chronic	7	0.0552896
clidinium	Proctitis	8	0.0548736
clidinium	Colonic Diseases - Functional	9	0.0534262
clidinium	Colonic Diseases	10	0.0496729
clindamycin	Status Epilepticus	1	0.109907
clindamycin	Onychomycosis	2	0.0801199
clindamycin	Glioblastoma	3	0.0785614
clindamycin	Choriocarcinoma	4	0.0769645
clindamycin	Sinoatrial Block	5	0.0756277
clindamycin	Malaria - Vivax	6	0.0752895
clindamycin	Magnesium Deficiency	7	0.0743473
clindamycin	Growth Disorders	8	0.0658976
clindamycin	Enteritis	9	0.0649227
clindamycin	Diarrhea	10	0.062746
clobetasol	Acne Vulgaris	1	0.177824
clobetasol	Collagen Diseases	2	0.166869
clobetasol	Shock - Cardiogenic	3	0.161133
clobetasol	Fatigue Syndrome - Chronic	4	0.157543
clobetasol	Eclampsia	5	0.153292
clobetasol	Hyperbilirubinemia	6	0.151219
clobetasol	Peritonitis	7	0.14992
clobetasol	Stress Disorders - Post-Traumatic	8	0.149324
clobetasol	Liver Cirrhosis	9	0.149308
clobetasol	Persistent Fetal Circulation Syndrome	10	0.145562
clocortolone	Acne Vulgaris	1	0.168561
clocortolone	Collagen Diseases	2	0.139493
clocortolone	Fever	3	0.137734
clocortolone	Pheochromocytoma	4	0.129714
clocortolone	Growth Disorders	5	0.127182
clocortolone	Strongyloidiasis	6	0.126906
clocortolone	Eczema	7	0.118702
clocortolone	Liver Neoplasms	8	0.113838
clocortolone	Sialorrhea	9	0.113283
clocortolone	Pharyngitis	10	0.111804
clofazimine	Constipation	1	0.111044
clofazimine	Eclampsia	2	0.106193
clofazimine	Tinea Versicolor	3	0.0849173
clofazimine	Schizophrenia	4	0.0407015
clofazimine	Status Epilepticus	5	0.0332557
clofazimine	Sigmoid Diseases	6	0.0311207
clofazimine	Hypoventilation	7	0.0308755
clofazimine	Poisoning	8	0.0304174
clofazimine	Respiratory Distress Syndrome - Adult	9	0.0303508
clofazimine	Dyspnea	10	0.0302424
clofibrate	Hypercalcemia	1	0.233263
clofibrate	Flank Pain	2	0.125277
clofibrate	Hyperbilirubinemia	3	0.0897633
clofibrate	Cellulitis	4	0.0448927
clofibrate	Mycoplasma Infections	5	0.0428902
clofibrate	Tourette Syndrome	6	0.0407838
clofibrate	Substance Withdrawal Syndrome	7	0.0402476
clofibrate	Hymenolepiasis	8	0.0386406
clofibrate	Osteosarcoma	9	0.0369078
clofibrate	Scleroderma - Systemic	10	0.0364153
clomiphene	Infertility	1	0.148446
clomiphene	Trichinellosis	2	0.0563161
clomiphene	Inappropriate ADH Syndrome	3	0.0511782
clomiphene	Endometrial Hyperplasia	4	0.0437813
clomiphene	Cellulitis	5	0.0421672
clomiphene	Mydriasis	6	0.0416431
clomiphene	Toxoplasmosis	7	0.0402491
clomiphene	Hypoventilation	8	0.0381739
clomiphene	Genital Diseases - Female	9	0.037923
clomiphene	Otitis Media	10	0.0363231
clomipramine	Stroke	1	0.109431
clomipramine	Autistic Disorder	2	0.106535
clomipramine	Echinococcosis	3	0.105282
clomipramine	Child Behavior Disorders	4	0.105099
clomipramine	Scabies	5	0.104367
clomipramine	Attention Deficit and Disruptive Behavior Disorders	6	0.097399
clomipramine	Hepatitis C - Chronic	7	0.0931529
clomipramine	Attention Deficit Disorder with Hyperactivity	8	0.0920063
clomipramine	Conduct Disorder	9	0.0884363
clomipramine	Pain - Postoperative	10	0.0847721
clonidine	Ovarian Neoplasms	1	0.178745
clonidine	Dyspnea	2	0.176477
clonidine	Clostridium Infections	3	0.172746
clonidine	Epididymitis	4	0.172315
clonidine	Sporotrichosis	5	0.167908
clonidine	Epilepsy	6	0.162207
clonidine	Attention Deficit and Disruptive Behavior Disorders	7	0.15321
clonidine	Epilepsy - Benign Neonatal	8	0.151302
clonidine	Dracunculiasis	9	0.149489
clonidine	Cluster Headache	10	0.143624
clotrimazole	Neoplasms	1	0.183575
clotrimazole	Postoperative Nausea and Vomiting	2	0.159944
clotrimazole	Opioid-Related Disorders	3	0.131016
clotrimazole	Miosis	4	0.128953
clotrimazole	Conjunctivitis - Bacterial	5	0.11165
clotrimazole	Tonsillitis	6	0.0852359
clotrimazole	Eating Disorders	7	0.0759869
clotrimazole	Wolff-Parkinson-White Syndrome	8	0.0522308
clotrimazole	Candidiasis	9	0.0433077
clotrimazole	Scleritis	10	0.0414507
cloxacillin	Sporotrichosis	1	0.299573
cloxacillin	Burns	2	0.159422
cloxacillin	Pyelonephritis	3	0.12837
cloxacillin	Osteolysis	4	0.110804
cloxacillin	Extravasation of Diagnostic and Therapeutic Materials	5	0.0931904
cloxacillin	Spirochaetales Infections	6	0.0930173
cloxacillin	Arthritis	7	0.0913777
cloxacillin	Osteoarthritis	8	0.0883127
cloxacillin	Sinusitis	9	0.0819784
cloxacillin	Stomach Ulcer	10	0.0796666
clozapine	Strongyloidiasis	1	0.113579
clozapine	Conjunctivitis - Viral	2	0.110842
clozapine	Autistic Disorder	3	0.109974
clozapine	Chickenpox	4	0.107442
clozapine	Echinococcosis	5	0.105972
clozapine	Scalp Dermatoses	6	0.105479
clozapine	Attention Deficit and Disruptive Behavior Disorders	7	0.101776
clozapine	Psychophysiologic Disorders	8	0.0962762
clozapine	Hepatitis C - Chronic	9	0.0953182
clozapine	Attention Deficit Disorder with Hyperactivity	10	0.092286
colchicine	Hyperaldosteronism	1	0.138296
colchicine	Lice Infestations	2	0.11526
colchicine	Leukocytosis	3	0.113454
colchicine	Impetigo	4	0.0822353
colchicine	Listeriosis	5	0.0614284
colchicine	Abnormalities - Drug-Induced	6	0.0600659
colchicine	Pain - Intractable	7	0.0449074
colchicine	Hypertension - Malignant	8	0.0437234
colchicine	Mycoplasma Infections	9	0.0414193
colchicine	Tourette Syndrome	10	0.0396154
cromolyn	Fissure in Ano	1	0.52982
cromolyn	Condylomata Acuminata	2	0.106649
cromolyn	Myasthenia Gravis	3	0.0996849
cromolyn	Giardiasis	4	0.093146
cromolyn	Genital Diseases - Female	5	0.089305
cromolyn	Phobic Disorders	6	0.0858761
cromolyn	Lupus Erythematosus - Systemic	7	0.0834487
cromolyn	Gaucher Disease	8	0.0817124
cromolyn	Lyme Disease	9	0.0795756
cromolyn	Neutropenia	10	0.0754895
cyclacillin	Stomach Neoplasms	1	0.077777
cyclacillin	Gonorrhea	2	0.0727492
cyclacillin	Sinoatrial Block	3	0.0618022
cyclacillin	Pulmonary Edema	4	0.0476254
cyclacillin	Spondylitis - Ankylosing	5	0.0390323
cyclacillin	Candidiasis	6	0.0370579
cyclacillin	Leishmaniasis - Visceral	7	0.0324437
cyclacillin	Proteus Infections	8	0.0304011
cyclacillin	Gastroparesis	9	0.0279713
cyclacillin	Pulmonary Valve Stenosis	10	0.0278303
cyclizine	Eclampsia	1	0.105368
cyclizine	Herpes Genitalis	2	0.0930306
cyclizine	Toothache	3	0.0487408
cyclizine	Myelitis - Transverse	4	0.040668
cyclizine	Neurologic Manifestations	5	0.0334492
cyclizine	Fatigue Syndrome - Chronic	6	0.0322154
cyclizine	Neuroblastoma	7	0.030716
cyclizine	Encephalitis - Herpes Simplex	8	0.0303785
cyclizine	Malaria - Cerebral	9	0.030337
cyclizine	Meningitis - Haemophilus	10	0.0288361
cyclobenzaprine	Epilepsy - Complex Partial	1	0.191181
cyclobenzaprine	Epilepsy - Absence	2	0.187716
cyclobenzaprine	Oral Ulcer	3	0.186436
cyclobenzaprine	Cluster Headache	4	0.185518
cyclobenzaprine	Epilepsy - Temporal Lobe	5	0.161548
cyclobenzaprine	Epilepsy - Tonic-Clonic	6	0.156449
cyclobenzaprine	Skin Diseases - Infectious	7	0.132019
cyclobenzaprine	Myocardial Infarction	8	0.128659
cyclobenzaprine	Schizophrenia	9	0.115359
cyclobenzaprine	Epilepsy	10	0.112273
cycloserine	Hypercalcemia	1	0.0693501
cycloserine	Hypotension - Orthostatic	2	0.0368079
cycloserine	Respiratory Tract Diseases	3	0.0338935
cycloserine	Polycythemia Vera	4	0.0335792
cycloserine	Pruritus	5	0.0333583
cycloserine	Purpura	6	0.0331634
cycloserine	Dyspnea	7	0.0327739
cycloserine	Nelson Syndrome	8	0.0318328
cycloserine	Cardiomyopathy - Dilated	9	0.0317368
cycloserine	Folic Acid Deficiency	10	0.030233
cyclothiazide	Mycosis Fungoides	1	0.0397507
cyclothiazide	Elephantiasis	2	0.0377003
cyclothiazide	Encephalitis - Herpes Simplex	3	0.0359361
cyclothiazide	Fatigue Syndrome - Chronic	4	0.0314615
cyclothiazide	Nephritis	5	0.0298759
cyclothiazide	Malaria	6	0.0296972
cyclothiazide	Echinococcosis	7	0.0291428
cyclothiazide	Meningitis - Bacterial	8	0.0281503
cyclothiazide	Meningeal Neoplasms	9	0.0271549
cyclothiazide	Meningitis - Haemophilus	10	0.0265035
cyproheptadine	Clostridium Infections	1	0.198001
cyproheptadine	Necrosis	2	0.192259
cyproheptadine	Epilepsies - Partial	3	0.140393
cyproheptadine	Epilepsy - Complex Partial	4	0.12228
cyproheptadine	Sleep Disorders	5	0.118032
cyproheptadine	Epilepsy - Absence	6	0.114373
cyproheptadine	Epididymitis	7	0.107602
cyproheptadine	Eating Disorders	8	0.107465
cyproheptadine	Epilepsy - Benign Neonatal	9	0.0977775
cyproheptadine	Sarcoma - Ewings	10	0.0932653
cysteamine	Hepatitis C - Chronic	1	0.105268
cysteamine	Hypercalcemia	2	0.06566
cysteamine	Mydriasis	3	0.0498576
cysteamine	Sunburn	4	0.0435675
cysteamine	Cellulitis	5	0.0434671
cysteamine	Meningitis - Bacterial	6	0.0415272
cysteamine	Hypotension - Orthostatic	7	0.0411725
cysteamine	Embolism	8	0.0408606
cysteamine	Toxoplasmosis	9	0.0405124
cysteamine	Neuroblastoma	10	0.0404401
cytarabine	Ependymoma	1	0.106394
cytarabine	Hypereosinophilic Syndrome	2	0.0968194
cytarabine	Neoplasms - Hormone-Dependent	3	0.0925664
cytarabine	Mycobacterium Infections - Atypical	4	0.0906384
cytarabine	Elephantiasis	5	0.090011
cytarabine	Anemia - Megaloblastic	6	0.0847684
cytarabine	Carcinoma - Medullary	7	0.0845221
cytarabine	Tetanus	8	0.0790291
cytarabine	Blood Coagulation Disorders	9	0.0783714
cytarabine	Leukemia - Myeloid - Acute	10	0.0774354
dacarbazine	Carcinoma - Small Cell	1	0.262512
dacarbazine	Carcinoma - Basal Cell	2	0.260114
dacarbazine	Peripheral Vascular Diseases	3	0.21119
dacarbazine	Bronchial Neoplasms	4	0.174956
dacarbazine	Endometrial Hyperplasia	5	0.160984
dacarbazine	Enuresis	6	0.157251
dacarbazine	Otitis Media	7	0.15197
dacarbazine	Lymphoma	8	0.144971
dacarbazine	Mastocytosis	9	0.141357
dacarbazine	Leukemia - Myeloid - Accelerated Phase	10	0.136299
dalfopristin	Polyuria	1	0.0298175
dalfopristin	Dyspnea	2	0.0298122
dalfopristin	Respiratory Tract Fistula	3	0.0296093
dalfopristin	Hypoventilation	4	0.029217
dalfopristin	Gastroparesis	5	0.0273659
dalfopristin	Miosis	6	0.0270861
dalfopristin	Dyskinesia - Drug-Induced	7	0.0269789
dalfopristin	Toothache	8	0.0269344
dalfopristin	Cough	9	0.0267085
dalfopristin	Purpura - Thrombocytopenic - Idiopathic	10	0.0263163
danazol	Mycoplasma Infections	1	0.0413964
danazol	Familial Mediterranean Fever	2	0.0328254
danazol	Nephritis	3	0.0314583
danazol	Embolism	4	0.031124
danazol	Magnesium Deficiency	5	0.0308266
danazol	Melanoma	6	0.0299378
danazol	Meningeal Neoplasms	7	0.0293712
danazol	Meningitis - Cryptococcal	8	0.0288329
danazol	Meningitis - Bacterial	9	0.0283915
danazol	Virus Diseases	10	0.0279027
dantrolene	Epilepsy - Post-Traumatic	1	0.336546
dantrolene	Epilepsy - Absence	2	0.279159
dantrolene	Haemophilus Infections	3	0.231004
dantrolene	Epididymitis	4	0.227719
dantrolene	Epilepsy - Complex Partial	5	0.2277
dantrolene	Scalp Dermatoses	6	0.223552
dantrolene	Epilepsy - Benign Neonatal	7	0.220034
dantrolene	Epilepsies - Partial	8	0.208802
dantrolene	Clonorchiasis	9	0.198148
dantrolene	Skin Diseases - Infectious	10	0.141072
dapiprazole	Eclampsia	1	0.105598
dapiprazole	Herpes Genitalis	2	0.0939162
dapiprazole	Toothache	3	0.063728
dapiprazole	Glaucoma - Angle-Closure	4	0.0580442
dapiprazole	Constipation	5	0.0513379
dapiprazole	Macular Edema	6	0.0473328
dapiprazole	Glaucoma - Open-Angle	7	0.0472641
dapiprazole	Obsessive-Compulsive Disorder	8	0.0414966
dapiprazole	Glaucoma	9	0.0390974
dapiprazole	Conjunctivitis	10	0.0271579
dapsone	Dermatitis	1	0.399289
dapsone	Amyotrophic Lateral Sclerosis	2	0.101335
dapsone	Onychomycosis	3	0.0932388
dapsone	Malaria - Vivax	4	0.0912911
dapsone	Chromoblastomycosis	5	0.0907451
dapsone	Magnesium Deficiency	6	0.0862964
dapsone	Diverticulitis	7	0.0841408
dapsone	Autistic Disorder	8	0.0786944
dapsone	Enterobacteriaceae Infections	9	0.0771099
dapsone	Huntington Disease	10	0.0746019
daunorubicin	Hypereosinophilic Syndrome	1	0.0922321
daunorubicin	Elephantiasis	2	0.0849
daunorubicin	Anemia - Megaloblastic	3	0.0791645
daunorubicin	Ependymoma	4	0.0755907
daunorubicin	Tetralogy of Fallot	5	0.0722722
daunorubicin	Blood Coagulation Disorders	6	0.072215
daunorubicin	Mycoplasma Infections	7	0.0640928
daunorubicin	Polychondritis - Relapsing	8	0.0582215
daunorubicin	Carcinoma - Medullary	9	0.0567943
daunorubicin	Lymphoma - Non-Hodgkin	10	0.0539102
delavirdine	Respiratory Distress Syndrome - Newborn	1	0.0432712
delavirdine	Hypotension - Orthostatic	2	0.0302622
delavirdine	Respiratory Tract Diseases	3	0.0297784
delavirdine	Dyspepsia	4	0.0297479
delavirdine	Gastrointestinal Neoplasms	5	0.0278314
delavirdine	Mesothelioma	6	0.0271716
delavirdine	Dysentery - Bacillary	7	0.026519
delavirdine	Torsades de Pointes	8	0.0264453
delavirdine	Nelson Syndrome	9	0.0260798
delavirdine	Meningococcal Infections	10	0.0259684
demecarium	Glaucoma	1	0.141803
demecarium	Conjunctivitis	2	0.133242
demecarium	Lymphoma - T-Cell - Cutaneous	3	0.132736
demecarium	Obsessive-Compulsive Disorder	4	0.12935
demecarium	Schizophrenia - Paranoid	5	0.124546
demecarium	Blepharospasm	6	0.101954
demecarium	Eye Diseases	7	0.0704549
demecarium	Uterine Hemorrhage	8	0.0504491
demecarium	Joint Diseases	9	0.0355081
demecarium	Cellulitis	10	0.0350267
demeclocycline	Gram-Negative Bacterial Infections	1	0.233523
demeclocycline	Stomach Ulcer	2	0.0867725
demeclocycline	Hypercalcemia	3	0.0704898
demeclocycline	Leishmaniasis	4	0.0700118
demeclocycline	Sinusitis	5	0.0681277
demeclocycline	Tremor	6	0.0568362
demeclocycline	Infertility	7	0.0549292
demeclocycline	Respiratory Distress Syndrome - Adult	8	0.0522455
demeclocycline	Pulmonary Edema	9	0.049695
demeclocycline	Endometrial Hyperplasia	10	0.0456363
deserpidine	Scalp Dermatoses	1	0.0895308
deserpidine	Conduct Disorder	2	0.0650411
deserpidine	Bipolar Disorder	3	0.0551775
deserpidine	Attention Deficit Disorder with Hyperactivity	4	0.0542829
deserpidine	Psychomotor Agitation	5	0.0468219
deserpidine	Child Behavior Disorders	6	0.0338081
deserpidine	Scabies	7	0.0314688
deserpidine	Condylomata Acuminata	8	0.0268845
deserpidine	Attention Deficit and Disruptive Behavior Disorders	9	0.0260571
deserpidine	Joint Diseases	10	0.0250769
desflurane	Polyuria	1	0.0431514
desflurane	Porphyria Cutanea Tarda	2	0.038883
desflurane	Precursor Cell Lymphoblastic Leukemia-Lymphoma	3	0.0386059
desflurane	Endocarditis - Bacterial	4	0.0384358
desflurane	Myxedema	5	0.0381056
desflurane	Keratitis - Dendritic	6	0.0365649
desflurane	Adrenal Hyperplasia - Congenital	7	0.0363794
desflurane	Lupus Erythematosus - Systemic	8	0.0359885
desflurane	Pregnancy Complications - Infectious	9	0.0358846
desflurane	Lyme Disease	10	0.0358676
desipramine	Strongyloidiasis	1	0.111961
desipramine	Attention Deficit and Disruptive Behavior Disorders	2	0.110473
desipramine	Chickenpox	3	0.108288
desipramine	Scalp Dermatoses	4	0.105897
desipramine	Eating Disorders	5	0.104585
desipramine	Hepatitis B	6	0.0909756
desipramine	Complex Regional Pain Syndromes	7	0.0891514
desipramine	Scabies	8	0.0610634
desipramine	Bartter Syndrome	9	0.0594352
desipramine	Psychomotor Agitation	10	0.0558288
desloratadine	Constipation	1	0.11049
desloratadine	Eclampsia	2	0.105623
desloratadine	Toothache	3	0.0844131
desloratadine	Pulmonary Emphysema	4	0.0450259
desloratadine	Scleroderma - Systemic	5	0.0395726
desloratadine	Ear Diseases	6	0.0394962
desloratadine	Mycosis Fungoides	7	0.0384824
desloratadine	Polyuria	8	0.0300673
desloratadine	Gastroparesis	9	0.0280769
desloratadine	Miosis	10	0.027421
desogestrel	Mycosis Fungoides	1	0.0432101
desogestrel	Meningeal Neoplasms	2	0.0373938
desogestrel	Endocarditis - Bacterial	3	0.0370797
desogestrel	Fatigue	4	0.0347028
desogestrel	Meningitis - Meningococcal	5	0.0344542
desogestrel	Meningitis - Haemophilus	6	0.0342891
desogestrel	Meningitis - Bacterial	7	0.0341255
desogestrel	Malaria - Avian	8	0.0334781
desogestrel	Nephrotic Syndrome	9	0.0328362
desogestrel	Encephalitis - Herpes Simplex	10	0.0325159
desonide	Acne Vulgaris	1	0.170035
desonide	Collagen Diseases	2	0.141665
desonide	Fever	3	0.13304
desonide	Pheochromocytoma	4	0.129828
desonide	Gram-Positive Bacterial Infections	5	0.127926
desonide	Stroke	6	0.126802
desonide	Eczema	7	0.121715
desonide	Liver Neoplasms	8	0.115731
desonide	Pharyngitis	9	0.115706
desonide	Sigmoid Diseases	10	0.108542
desoximetasone	Acne Vulgaris	1	0.169584
desoximetasone	Fibrocystic Breast Disease	2	0.151195
desoximetasone	Collagen Diseases	3	0.140012
desoximetasone	Pheochromocytoma	4	0.130623
desoximetasone	Strongyloidiasis	5	0.12837
desoximetasone	Growth Disorders	6	0.127387
desoximetasone	Pharyngitis	7	0.124289
desoximetasone	Eczema	8	0.11995
desoximetasone	Liver Neoplasms	9	0.116717
desoximetasone	Sialorrhea	10	0.115002
dexamethasone	Lupus Erythematosus - Systemic	1	0.111589
dexamethasone	Mycobacterium Infections	2	0.106381
dexamethasone	Hyperaldosteronism	3	0.0868242
dexamethasone	Myocardial Infarction	4	0.081766
dexamethasone	Eclampsia	5	0.0793462
dexamethasone	Food Hypersensitivity	6	0.0769844
dexamethasone	Ancylostomiasis	7	0.0741833
dexamethasone	Blastomycosis	8	0.0670445
dexamethasone	Tachycardia - Supraventricular	9	0.0657669
dexamethasone	Gonorrhea	10	0.0657641
dexbrompheniramine	Ear Diseases	1	0.115636
dexbrompheniramine	Constipation	2	0.110854
dexbrompheniramine	Eclampsia	3	0.105935
dexbrompheniramine	Otitis Externa	4	0.101893
dexbrompheniramine	Toothache	5	0.0846152
dexbrompheniramine	Pulmonary Emphysema	6	0.0565722
dexbrompheniramine	Pleural Effusion	7	0.0475886
dexbrompheniramine	Sinoatrial Block	8	0.0443999
dexbrompheniramine	Scleroderma - Systemic	9	0.0399926
dexbrompheniramine	Polyuria	10	0.0304246
dexmedetomidine	Psoriasis	1	0.194278
dexmedetomidine	Eclampsia	2	0.105727
dexmedetomidine	Herpes Genitalis	3	0.0945435
dexmedetomidine	Spasm	4	0.0323219
dexmedetomidine	Toothache	5	0.0310618
dexmedetomidine	Endocarditis - Subacute Bacterial	6	0.0266611
dexmedetomidine	Polyuria	7	0.0264711
dexmedetomidine	Condylomata Acuminata	8	0.0263255
dexmedetomidine	Adrenal Hyperplasia - Congenital	9	0.0262843
dexmedetomidine	Keratitis - Dendritic	10	0.0247606
dexrazoxane	Toxoplasmosis	1	0.0384641
dexrazoxane	Otitis Media	2	0.0344044
dexrazoxane	Abdominal Abscess	3	0.0337413
dexrazoxane	Neurologic Manifestations	4	0.0335141
dexrazoxane	Fatigue	5	0.0328308
dexrazoxane	Hypotension - Orthostatic	6	0.0326265
dexrazoxane	Neuroblastoma	7	0.031705
dexrazoxane	Embolism	8	0.0314325
dexrazoxane	Foot Dermatoses	9	0.0312778
dexrazoxane	Respiratory Tract Diseases	10	0.0308291
dextromethorphan	Coronary Disease	1	0.369827
dextromethorphan	Apnea	2	0.0869432
dextromethorphan	Dyspepsia	3	0.0658193
dextromethorphan	Pulmonary Embolism	4	0.0559679
dextromethorphan	Hypotension - Orthostatic	5	0.0418363
dextromethorphan	Neurologic Manifestations	6	0.0348565
dextromethorphan	Fatigue	7	0.0325334
dextromethorphan	Malaria - Avian	8	0.0317511
dextromethorphan	Meningitis - Meningococcal	9	0.0307876
dextromethorphan	Meningitis - Haemophilus	10	0.030531
dezocine	Endocarditis - Subacute Bacterial	1	0.0276892
dezocine	Condylomata Acuminata	2	0.0272441
dezocine	Adrenal Hyperplasia - Congenital	3	0.0267947
dezocine	Keratitis - Dendritic	4	0.0254268
dezocine	Polyuria	5	0.0250723
dezocine	Rheumatic Diseases	6	0.0248335
dezocine	Endocarditis - Bacterial	7	0.0236511
dezocine	Precursor Cell Lymphoblastic Leukemia-Lymphoma	8	0.0229391
dezocine	Arthritis - Gouty	9	0.0228845
[truncated: 5,631 more rows]
